# Supplementary material for: Heat Capacity of Indium or Gallium Sesqui-Chalcogenides
Source: MDPI journal article supplement (doi:10.3390/ma17020361), 2024-01-11
Supplement: s1 [file s1]

# Heat capacity of indium or gallium sesqui-chalcogenides

Květoslav Růžička<sup>1</sup>, Václav Pokorný<sup>1,2</sup>, Jan Plutnar<sup>3</sup>, Iva Plutnarová<sup>3</sup>, Bing Wu<sup>3</sup>, Zdeněk Sofer<sup>3</sup>  
and David Sedmidubský<sup>3,\*</sup>

<sup>1</sup> Department of Physical Chemistry, Faculty of Chemical Engineering, University of Chemistry and Technology, Prague, Technická 5, 166 28 Prague, Czech Republic; ruzickak@vscht.cz (K.R.); pokorny@imc.cas.cz (V.P.)

<sup>2</sup> Institute of Macromolecular Chemistry, Czech Academy of Sciences, Heyrovského Nám. 2, 162 06 Prague, Czech Republic

<sup>3</sup> Department of Inorganic Chemistry, Faculty of Chemical Technology, University of Chemistry and Technology, Prague, Technická 5, 166 28 Prague, Czech Republic; jan.plutnar@vscht.cz (J.P.); iva.plutnarova@vscht.cz (I.P.); bing1.wu@vscht.cz (B.W.); zdenek.sofer@vscht.cz (Z.S.)

\* Correspondence: sedmidub@vscht.cz

## 1. X-ray photoelectron spectroscopy (XPS) results for the core regions of the chalcogenides (S-2p, Se-3d, and Te-3d, respectively).

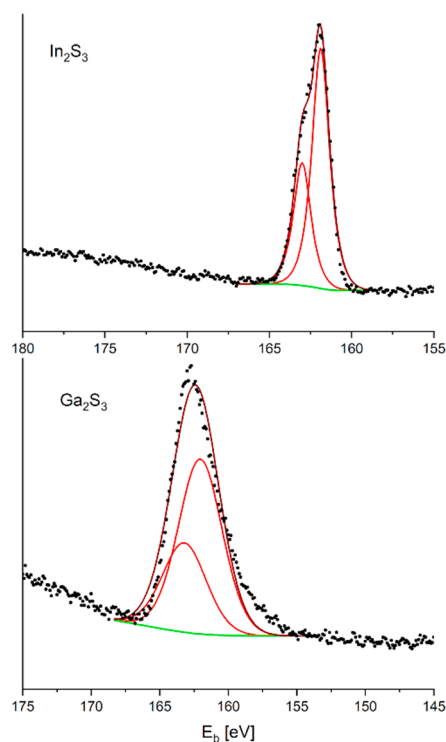

**Figure S1.** XPS spectrum of the S-2p core region of  $\text{In}_2\text{S}_3$  (top) and  $\text{Ga}_2\text{S}_3$  (bottom). Black dots represent the acquired data, the green lines represent the baseline fit, red lines represent the fitted components, the brown lines represent the sum of the fits.

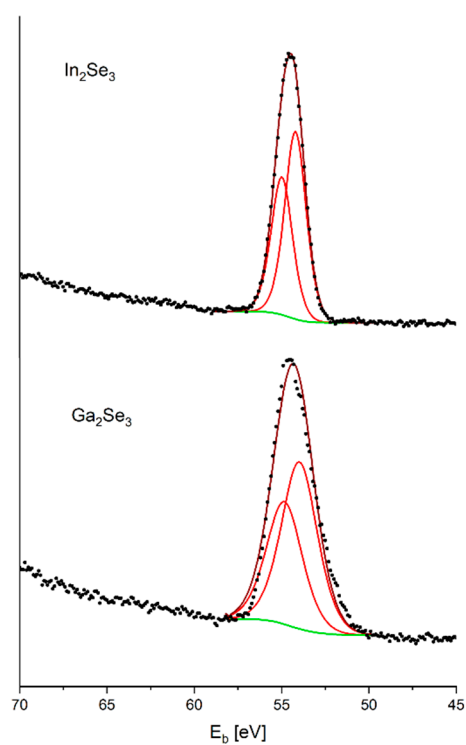

**Figure S2.** XPS spectrum of the Se-3d core region of  $\text{In}_2\text{Se}_3$  (top) and  $\text{Ga}_2\text{Se}_3$  (bottom). Black dots represent the acquired data, the green lines represent the baseline fit, red lines represent the fitted components, the brown lines represent the sum of the fits.

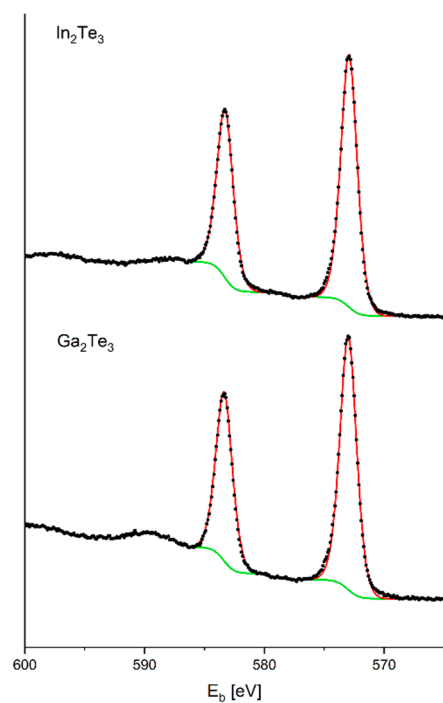

**Figure S3.** XPS spectrum of the Te-3d core region of  $\text{In}_2\text{Te}_3$  (top) and  $\text{Ga}_2\text{Te}_3$  (bottom). Black dots represent the acquired data, the green lines represent the baseline fit, and the red lines represent the fitted components.

## 2. Auxiliary properties describing the quality of PPMS measurement

Figure S4 shows the sample coupling during PPMS measurements. Sample coupling is a property describing the thermal contact between the sample and the platform. A lower value generally means higher uncertainty of the data. For reliable data, the coupling should be above 90%. This was not the case for  $\text{In}_2\text{Se}_3$  above 270 K, and those points were therefore not considered in the correlation.

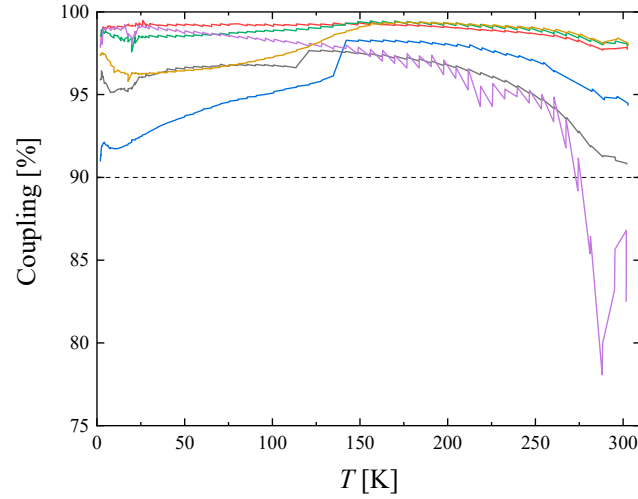

**Figure S4.** Sample coupling of PPMS samples.  $\text{Ga}_2\text{S}_3$  (black —),  $\text{Ga}_2\text{Se}_3$  (red —),  $\text{Ga}_2\text{Te}_3$  (blue —),  $\text{In}_2\text{S}_3$  (green —),  $\text{In}_2\text{Se}_3$  (purple —),  $\text{In}_2\text{Te}_3$  (olive —).

Figure S5 shows the relative contribution to heat capacity of different parts of the PPMS experimental setup. The lower contribution of the sample also increases uncertainty, and the sample should ideally contribute with at least 50% of the total heat capacity. That is, however, not always possible, especially with samples in copper foil. Bigger samples also usually have lower sample coupling, so a balance between these two factors has to be made.

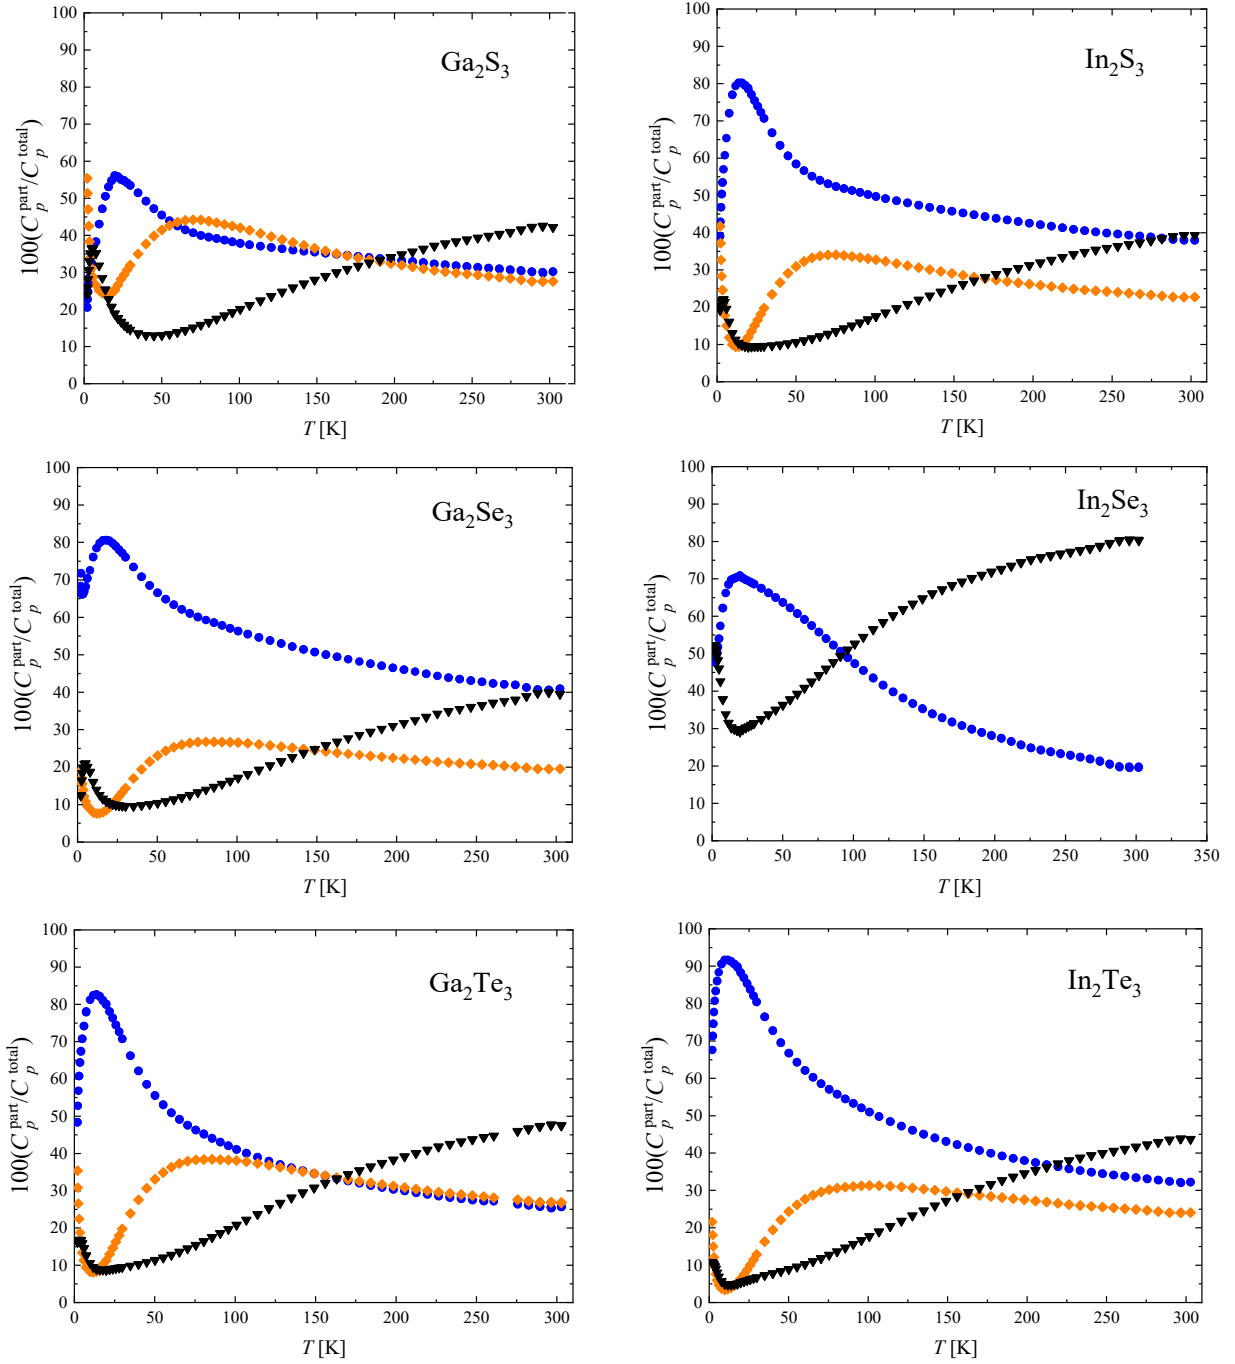

**Figure S5.** Relative contribution to heat capacity of different parts of the PPMS experimental setup: blue ●, sample; orange ◆, copper; black ▼, addenda.

### 3. Experimental heat capacities

This section contains experimental heat capacity data obtained in this work by the means of Tian–Calvet calorimetry (apparatus SETARAM  $\mu$ DSC IIIa), and relaxation calorimetry (apparatus Quantum Design PPMS). Due to their lower accuracy, data obtained using the Quantum Design PPMS were slightly adjusted to agree with results from the more accurate SETARAM  $\mu$ DSC IIIa, as described in section 2.3 of the main manuscript. These correction factors are shown in the footnote of each table.

**Table S1.** Experimental heat capacity of  $\text{Ga}_2\text{S}_3$  (in  $\text{J K}^{-1} \text{mol}^{-1}$ ) obtained using Tian–Calvet calorimetry (SETARAM  $\mu$ DSC IIIa)<sup>a</sup>.

| $T / \text{K}$ | $C_{pm} / \text{J} \cdot \text{K}^{-1} \cdot \text{mol}^{-1}$ | $\delta_{\text{rel}}^b$ |
|----------------|---------------------------------------------------------------|-------------------------|
| 271.06         | 109.81                                                        | -0.13                   |
| 275.00         | 110.26                                                        | -0.11                   |
| 280.00         | 110.82                                                        | -0.07                   |
| 285.00         | 111.46                                                        | 0.06                    |
| 290.00         | 112.02                                                        | 0.14                    |
| 295.00         | 112.57                                                        | 0.22                    |
| 300.00         | 112.99                                                        | 0.21                    |
| 305.00         | 113.37                                                        | 0.18                    |
| 310.00         | 113.77                                                        | 0.18                    |
| 315.00         | 114.19                                                        | 0.21                    |
| 320.00         | 114.64                                                        | 0.28                    |
| 325.00         | 114.97                                                        | 0.25                    |
| 330.00         | 115.13                                                        | 0.10                    |
| 335.00         | 115.35                                                        | -0.01                   |
| 340.00         | 115.53                                                        | -0.13                   |
| 345.00         | 115.77                                                        | -0.20                   |
| 350.00         | 116.12                                                        | -0.16                   |
| 352.83         | 116.24                                                        | -0.20                   |

<sup>a</sup> Standard uncertainty  $u$  is  $u(T) = 0.05 \text{ K}$ , and the combined expanded uncertainty of the heat capacity is  $U_c(C_{p,m}) = 0.01 C_{p,m}$  (0.95 level of confidence). Values are reported with one digit more than is justified by the experimental uncertainty to avoid round-off errors in calculations based on these results.

<sup>b</sup>  $\delta_{\text{rel}} = 100 \times (C_{pm} - C_{pm}^o) / C_{pm}^o$ , where heat capacity is calculated by means of Eqs. 1 and 2 with parameters from Table 2 in the main article.

**Table S2.** Experimental heat capacity of Ga<sub>2</sub>S<sub>3</sub> (in J K<sup>-1</sup> mol<sup>-1</sup>) obtained using the relaxation technique (Quantum Design PPMs)<sup>a</sup>.

| <i>T</i> / K | <i>C<sub>pm</sub></i> /<br>J·K <sup>-1</sup> ·mol <sup>-1</sup> | δ <sub>rel</sub> <sup>b</sup> | <i>T</i> / K | <i>C<sub>pm</sub></i> /<br>J·K <sup>-1</sup> ·mol <sup>-1</sup> | δ <sub>rel</sub> <sup>b</sup> |
|--------------|-----------------------------------------------------------------|-------------------------------|--------------|-----------------------------------------------------------------|-------------------------------|
|              | Run 1                                                           |                               |              | Run 2                                                           |                               |
| 302.163      | 113.17                                                          | 0.21                          | 302.150      | 113.34                                                          | 0.37                          |
| 295.736      | 111.10                                                          | -1.14                         | 295.453      | 112.79                                                          | 0.38                          |
| 288.727      | 111.84                                                          | 0.09                          | 288.456      | 112.60                                                          | 0.79                          |
| 281.782      | 110.80                                                          | -0.25                         | 281.484      | 111.61                                                          | 0.51                          |
| 274.789      | 109.79                                                          | -0.51                         | 274.503      | 110.55                                                          | 0.20                          |
| 267.795      | 109.04                                                          | -0.50                         | 267.523      | 109.61                                                          | 0.04                          |
| 260.850      | 108.08                                                          | -0.64                         | 260.561      | 108.69                                                          | -0.05                         |
| 253.858      | 107.22                                                          | -0.64                         | 253.571      | 107.72                                                          | -0.13                         |
| 246.854      | 106.36                                                          | -0.56                         | 246.578      | 106.84                                                          | -0.08                         |
| 239.844      | 105.53                                                          | -0.40                         | 239.575      | 106.02                                                          | 0.10                          |
| 232.856      | 104.59                                                          | -0.27                         | 232.578      | 105.03                                                          | 0.20                          |
| 225.806      | 103.50                                                          | -0.19                         | 225.554      | 103.91                                                          | 0.24                          |
| 218.791      | 102.37                                                          | -0.08                         | 218.545      | 102.78                                                          | 0.38                          |
| 211.793      | 100.82                                                          | -0.28                         | 211.557      | 101.20                                                          | 0.15                          |
| 204.790      | 99.328                                                          | -0.32                         | 204.558      | 99.732                                                          | 0.14                          |
| 197.777      | 97.814                                                          | -0.27                         | 197.558      | 98.183                                                          | 0.16                          |
| 190.780      | 96.283                                                          | -0.12                         | 190.568      | 96.659                                                          | 0.33                          |
| 183.777      | 94.572                                                          | -0.02                         | 183.570      | 94.960                                                          | 0.45                          |
| 176.754      | 92.760                                                          | 0.12                          | 176.545      | 93.149                                                          | 0.60                          |
| 169.705      | 90.792                                                          | 0.25                          | 169.501      | 91.148                                                          | 0.71                          |
| 162.728      | 88.539                                                          | 0.20                          | 162.530      | 88.887                                                          | 0.67                          |
| 155.675      | 86.067                                                          | 0.09                          | 155.469      | 86.356                                                          | 0.51                          |
| 148.663      | 83.477                                                          | 0.01                          | 148.454      | 83.611                                                          | 0.26                          |
| 141.729      | 80.562                                                          | -0.32                         | 141.502      | 80.771                                                          | 0.05                          |
| 134.673      | 77.653                                                          | -0.39                         | 134.454      | 77.839                                                          | -0.04                         |
| 127.674      | 74.664                                                          | -0.37                         | 127.463      | 74.857                                                          | 0.01                          |
| 120.689      | 71.496                                                          | -0.35                         | 120.485      | 71.637                                                          | -0.01                         |
| 113.714      | 67.957                                                          | -0.59                         | 113.519      | 68.120                                                          | -0.21                         |
| 106.681      | 64.308                                                          | -0.67                         | 106.494      | 64.446                                                          | -0.30                         |
| 100.680      | 61.089                                                          | -0.64                         | 100.489      | 61.206                                                          | -0.28                         |
| 95.603       | 58.463                                                          | -0.24                         | 95.431       | 58.590                                                          | 0.14                          |
| 90.570       | 55.734                                                          | 0.17                          | 90.406       | 55.821                                                          | 0.50                          |
| 85.480       | 52.656                                                          | 0.23                          | 85.317       | 52.709                                                          | 0.52                          |
| 80.414       | 49.246                                                          | -0.20                         | 80.254       | 49.337                                                          | 0.19                          |
| 75.331       | 45.733                                                          | -0.67                         | 75.176       | 45.773                                                          | -0.36                         |
| 70.313       | 42.532                                                          | -0.37                         | 70.164       | 42.550                                                          | -0.09                         |
| 65.222       | 39.102                                                          | -0.25                         | 65.077       | 39.172                                                          | 0.18                          |
| 60.196       | 35.696                                                          | 0.06                          | 60.058       | 35.759                                                          | 0.51                          |
| 55.104       | 32.317                                                          | 0.89                          | 54.969       | 32.328                                                          | 1.23                          |
| 50.080       | 28.583                                                          | 0.73                          | 49.950       | 28.602                                                          | 1.14                          |
| 45.013       | 24.585                                                          | -0.05                         | 44.888       | 24.574                                                          | 0.29                          |
| 39.941       | 20.420                                                          | -0.75                         | 39.821       | 20.382                                                          | -0.46                         |
| 34.744       | 15.972                                                          | -1.01                         | 34.732       | 15.986                                                          | -0.85                         |
| 29.676       | 11.509                                                          | -1.16                         | 29.668       | 11.522                                                          | -0.99                         |
| 27.799       | 9.9070                                                          | -1.06                         | 27.749       | 9.8988                                                          | -0.71                         |
| 25.761       | 8.3091                                                          | 0.02                          | 25.722       | 8.2033                                                          | -0.87                         |

| $T / \text{K}$ | $C_{pm} / \text{J}\cdot\text{K}^{-1}\cdot\text{mol}^{-1}$ | $\delta_{\text{rel}}^{\text{b}}$ | $T / \text{K}$ | $C_{pm} / \text{J}\cdot\text{K}^{-1}\cdot\text{mol}^{-1}$ | $\delta_{\text{rel}}^{\text{b}}$ |
|----------------|-----------------------------------------------------------|----------------------------------|----------------|-----------------------------------------------------------|----------------------------------|
| Run 1          |                                                           |                                  | Run 2          |                                                           |                                  |
| 23.872         | 6.7903                                                    | -0.41                            | 23.817         | 6.7144                                                    | -0.91                            |
| 21.756         | 5.4064                                                    | 2.21                             | 21.783         | 5.3608                                                    | 0.99                             |
| 19.670         | 4.1317                                                    | 4.34                             | 19.741         | 4.0842                                                    | 2.06                             |
| 17.634         | 2.8769                                                    | 0.95                             | 17.719         | 2.9346                                                    | 1.46                             |
| 15.689         | 1.9667                                                    | -0.04                            | 15.730         | 1.9754                                                    | -0.44                            |
| 13.683         | 1.2309                                                    | -1.21                            | 13.700         | 1.2322                                                    | -1.52                            |
| 11.717         | 0.714331                                                  | -1.47                            | 11.720         | 0.7137                                                    | -1.65                            |
| 9.674          | 0.366560                                                  | -0.09                            | 9.690          | 0.36805                                                   | -0.27                            |
| 7.607          | 0.160945                                                  | 0.26                             | 7.626          | 0.16157                                                   | -0.19                            |
| 5.929          | 0.0717415                                                 | 0.49                             | 5.931          | 0.071758                                                  | 0.41                             |
| 4.932          | 0.0403732                                                 | 0.31                             | 4.932          | 0.040288                                                  | 0.10                             |
| 4.104          | 0.0234448                                                 | 1.48                             | 4.106          | 0.023406                                                  | 1.17                             |
| 3.433          | 0.013555                                                  | -0.84                            | 3.430          | 0.013647                                                  | 0.09                             |
| 2.947          | 0.0087378                                                 | -0.79                            | 2.948          | 0.0087107                                                 | -1.19                            |
| 2.515          | 0.0055798                                                 | -0.61                            | 2.512          | 0.0055455                                                 | -0.88                            |
| 2.175          | 0.0037482                                                 | 0.51                             | 2.173          | 0.0037337                                                 | 0.38                             |
| 1.912          | 0.0026194                                                 | 0.81                             | 1.911          | 0.0025929                                                 | -0.06                            |

<sup>a</sup> Standard uncertainty of temperature is  $u(T)=0.004$  K, and the combined expanded uncertainty of heat capacity  $U_c(C_{pm})$  with 0.95 level of confidence ( $k=2$ ) is  $U_c(C_{pm})=0.1$   $C_{pm}$  below 10 K;  $U_c(C_{pm})=0.03$   $C_{pm}$  in temperature range 10 to 40 K;  $U_c(C_{pm})=0.02$   $C_{pm}$  in temperature range 40 to 300 K. Values are reported with more digits than is justified by the experimental uncertainty to avoid round-off errors in calculations based on these results. Measurements are performed in vacuum (residual pressure  $p<10^{-4}$  Pa). Excluded points are printed in gray. Experimental results from Quantum Design PPMS have been multiplied by a factor of 1.015 to agree with the more accurate SETARAM  $\mu$ DSC IIIa.

<sup>b</sup>  $\delta_{\text{rel}} = 100 \times (C_{pm} - C_{pm}^o) / C_{pm}^o$ , where heat capacity is calculated by means of Eqs. 1 and 2 with parameters from Table 2 in the main article.

**Table S3.** Experimental heat capacity of Ga<sub>2</sub>Se<sub>3</sub> (in J K<sup>-1</sup> mol<sup>-1</sup>) obtained using Tian–Calvet calorimetry (SETARAM μDSC IIIa)<sup>a</sup>.

| $T / \text{K}$ | $C_{pm} / \text{J} \cdot \text{K}^{-1} \cdot \text{mol}^{-1}$ | $\delta_{\text{rel}}^b$ |
|----------------|---------------------------------------------------------------|-------------------------|
| 266.36         | 118.58                                                        | -0.07                   |
| 270.00         | 118.92                                                        | 0.01                    |
| 275.00         | 119.22                                                        | -0.01                   |
| 280.00         | 119.52                                                        | -0.02                   |
| 285.00         | 119.94                                                        | 0.08                    |
| 290.00         | 120.31                                                        | 0.15                    |
| 295.00         | 120.58                                                        | 0.15                    |
| 300.00         | 120.73                                                        | 0.06                    |
| 305.00         | 120.80                                                        | -0.08                   |
| 310.00         | 120.88                                                        | -0.21                   |
| 315.00         | 121.22                                                        | -0.11                   |
| 320.00         | 121.44                                                        | -0.10                   |
| 325.00         | 121.74                                                        | -0.02                   |
| 330.00         | 122.01                                                        | 0.04                    |
| 335.00         | 121.93                                                        | -0.17                   |
| 340.00         | 122.12                                                        | -0.16                   |
| 345.00         | 122.38                                                        | -0.09                   |
| 350.00         | 122.98                                                        | 0.27                    |
| 352.74         | 122.91                                                        | 0.14                    |

<sup>a</sup> Standard uncertainty  $u$  is  $u(T) = 0.05$  K, and the combined expanded uncertainty of the heat capacity is  $U_c(C_{p,m}) = 0.01 C_{p,m}$  (0.95 level of confidence). Values are reported with one digit more than is justified by the experimental uncertainty to avoid round-off errors in calculations based on these results.

<sup>b</sup>  $\delta_{\text{rel}} = 100 \times (C_{pm} - C_{pm}^o) / C_{pm}^o$ , where heat capacity is calculated by means of Eqs. 1 and 2 with parameters from Table 2 in the main article.



**Table S4.** Experimental heat capacity of Ga<sub>2</sub>Se<sub>3</sub> (in J K<sup>-1</sup> mol<sup>-1</sup>) obtained using the relaxation technique (Quantum Design PPMS)<sup>a</sup>.

| $T / \text{K}$ | $C_{pm} / \text{J} \cdot \text{K}^{-1} \cdot \text{mol}^{-1}$ | $\delta_{\text{rel}}^b$ | $T / \text{K}$ | $C_{pm} / \text{J} \cdot \text{K}^{-1} \cdot \text{mol}^{-1}$ | $\delta_{\text{rel}}^b$ |
|----------------|---------------------------------------------------------------|-------------------------|----------------|---------------------------------------------------------------|-------------------------|
|                | Run 1                                                         |                         |                | Run 2                                                         |                         |
| 302.342        | 122.89                                                        | 1.76                    | 302.439        | 122.95                                                        | 1.80                    |
| 295.330        | 121.75                                                        | 1.11                    | 295.426        | 121.94                                                        | 1.26                    |
| 288.354        | 121.44                                                        | 1.17                    | 288.434        | 121.47                                                        | 1.19                    |
| 281.395        | 120.83                                                        | 1.00                    | 281.448        | 120.90                                                        | 1.06                    |
| 274.418        | 120.66                                                        | 1.22                    | 274.466        | 120.74                                                        | 1.29                    |
| 267.450        | 119.14                                                        | 0.34                    | 267.491        | 119.22                                                        | 0.41                    |
| 260.483        | 118.11                                                        | -0.11                   | 260.510        | 118.18                                                        | -0.05                   |
| 253.487        | 117.72                                                        | 0.02                    | 253.540        | 117.79                                                        | 0.08                    |
| 246.508        | 117.08                                                        | -0.03                   | 246.553        | 117.18                                                        | 0.05                    |
| 239.525        | 116.51                                                        | 0.01                    | 239.558        | 116.63                                                        | 0.12                    |
| 232.536        | 115.91                                                        | 0.08                    | 232.567        | 115.99                                                        | 0.15                    |
| 225.558        | 115.21                                                        | 0.10                    | 225.588        | 115.24                                                        | 0.13                    |
| 218.579        | 114.47                                                        | 0.14                    | 218.604        | 114.49                                                        | 0.16                    |
| 211.591        | 113.44                                                        | -0.02                   | 211.618        | 113.45                                                        | -0.01                   |
| 204.606        | 112.50                                                        | -0.04                   | 204.630        | 112.48                                                        | -0.06                   |
| 197.627        | 111.39                                                        | -0.14                   | 197.639        | 111.46                                                        | -0.08                   |
| 190.641        | 110.41                                                        | -0.05                   | 190.653        | 110.44                                                        | -0.03                   |
| 183.656        | 109.23                                                        | -0.06                   | 183.656        | 109.37                                                        | 0.07                    |
| 176.670        | 108.04                                                        | 0.03                    | 176.661        | 108.08                                                        | 0.07                    |
| 169.683        | 106.71                                                        | 0.10                    | 169.683        | 106.77                                                        | 0.16                    |
| 162.704        | 105.08                                                        | 0.02                    | 162.692        | 105.18                                                        | 0.12                    |
| 155.722        | 102.96                                                        | -0.38                   | 155.633        | 103.24                                                        | -0.08                   |
| 148.738        | 101.11                                                        | -0.35                   | 148.655        | 101.31                                                        | -0.13                   |
| 141.724        | 98.945                                                        | -0.44                   | 141.640        | 99.155                                                        | -0.20                   |
| 134.704        | 96.657                                                        | -0.43                   | 134.625        | 96.893                                                        | -0.15                   |
| 127.718        | 94.306                                                        | -0.23                   | 127.647        | 94.441                                                        | -0.05                   |
| 120.738        | 91.527                                                        | -0.19                   | 120.659        | 91.678                                                        | 0.02                    |
| 113.751        | 88.371                                                        | -0.22                   | 113.667        | 88.529                                                        | 0.00                    |
| 106.769        | 84.980                                                        | -0.14                   | 106.689        | 85.121                                                        | 0.07                    |
| 100.737        | 81.757                                                        | -0.06                   | 100.641        | 81.995                                                        | 0.30                    |
| 95.708         | 79.086                                                        | 0.32                    | 95.607         | 79.260                                                        | 0.62                    |
| 90.650         | 76.219                                                        | 0.77                    | 90.570         | 76.302                                                        | 0.95                    |
| 85.602         | 72.762                                                        | 0.71                    | 85.517         | 72.850                                                        | 0.92                    |
| 80.545         | 68.937                                                        | 0.41                    |                |                                                               |                         |
| 75.541         | 64.860                                                        | -0.08                   | 75.437         | 64.926                                                        | 0.15                    |
| 70.461         | 60.756                                                        | -0.28                   | 70.361         | 60.933                                                        | 0.15                    |
| 65.416         | 56.646                                                        | -0.25                   | 65.337         | 56.670                                                        | -0.09                   |
| 60.383         | 52.384                                                        | -0.19                   | 60.331         | 52.309                                                        | -0.25                   |
| 55.341         | 47.875                                                        | -0.26                   | 55.266         | 47.898                                                        | -0.08                   |
| 50.281         | 43.135                                                        | -0.46                   | 50.219         | 43.121                                                        | -0.36                   |
| 45.230         | 38.065                                                        | -1.08                   | 45.165         | 38.056                                                        | -0.94                   |
| 40.166         | 32.900                                                        | -1.12                   | 40.106         | 32.868                                                        | -1.02                   |
| 35.099         | 27.438                                                        | -0.61                   | 35.063         | 27.362                                                        | -0.73                   |
| 30.078         | 21.557                                                        | -0.10                   | 30.028         | 21.515                                                        | -0.01                   |
| 28.039         | 19.154                                                        | 0.48                    | 28.014         | 19.136                                                        | 0.55                    |
| 26.051         | 16.601                                                        | -0.04                   | 25.994         | 16.692                                                        | 0.93                    |

| $T / \text{K}$ | $C_{pm} / \text{J}\cdot\text{K}^{-1}\cdot\text{mol}^{-1}$ | $\delta_{\text{rel}}^{\text{b}}$ | $T / \text{K}$ | $C_{pm} / \text{J}\cdot\text{K}^{-1}\cdot\text{mol}^{-1}$ | $\delta_{\text{rel}}^{\text{b}}$ |
|----------------|-----------------------------------------------------------|----------------------------------|----------------|-----------------------------------------------------------|----------------------------------|
| Run 1          |                                                           |                                  | Run 2          |                                                           |                                  |
| 24.023         | 14.249                                                    | 0.79                             | 23.994         | 14.280                                                    | 1.26                             |
| 22.011         | 11.893                                                    | 1.13                             | 21.986         | 11.933                                                    | 1.72                             |
| 19.975         | 9.6244                                                    | 1.55                             | 19.962         | 9.5984                                                    | 1.43                             |
| 17.965         | 7.4102                                                    | 0.41                             | 17.955         | 7.3532                                                    | -0.23                            |
| 15.893         | 5.3717                                                    | -0.37                            | 15.890         | 5.3569                                                    | -0.59                            |
| 13.892         | 3.6419                                                    | -1.30                            | 13.894         | 3.6436                                                    | -1.30                            |
| 11.884         | 2.2580                                                    | -0.91                            | 11.882         | 2.2575                                                    | -0.88                            |
| 9.849          | 1.2305                                                    | 0.23                             | 9.857          | 1.2291                                                    | -0.15                            |
| 7.806          | 0.56162                                                   | -1.22                            | 7.809          | 0.56201                                                   | -1.28                            |
| 6.207          | 0.27650                                                   | 1.69                             | 6.204          | 0.27497                                                   | 1.28                             |
| 5.145          | 0.15159                                                   | 0.18                             | 5.146          | 0.15179                                                   | 0.26                             |
| 4.271          | 0.087567                                                  | 1.38                             | 4.273          | 0.087630                                                  | 1.32                             |
| 3.566          | 0.052969                                                  | 0.17                             | 3.563          | 0.052772                                                  | 0.01                             |
| 3.030          | 0.034901                                                  | -2.76                            | 3.030          | 0.034943                                                  | -2.64                            |
| 2.567          | 0.024012                                                  | -5.60                            | 2.568          | 0.024039                                                  | -5.56                            |
| 2.202          | 0.022155                                                  | 15.27                            | 2.203          | 0.022114                                                  | 14.96                            |
| 1.918          | 0.014312                                                  | -6.62                            | 1.917          | 0.014308                                                  | -6.57                            |

<sup>a</sup> Standard uncertainty of temperature is  $u(T)=0.004$  K, and the combined expanded uncertainty of heat capacity  $U_c(C_{pm})$  with 0.95 level of confidence ( $k=2$ ) is  $U_c(C_{pm})=0.1$   $C_{pm}$  below 10 K;  $U_c(C_{pm})=0.03$   $C_{pm}$  in temperature range 10 to 40 K;  $U_c(C_{pm})=0.02$   $C_{pm}$  in temperature range 40 to 300 K. Values are reported with more digits than is justified by the experimental uncertainty to avoid round-off errors in calculations based on these results. Measurements are performed in vacuum (residual pressure  $p<10^{-4}$  Pa). Excluded points are printed in gray.

<sup>b</sup>  $\delta_{\text{rel}} = 100 \times (C_{pm} - C_{pm}^o) / C_{pm}^o$ , where heat capacity is calculated by means of Eqs. 1 and 2 with parameters from Table 2 in the main article.

**Table S5.** Experimental heat capacity of Ga<sub>2</sub>Te<sub>3</sub> (in J K<sup>-1</sup> mol<sup>-1</sup>) obtained using Tian–Calvet calorimetry (SETARAM μDSC IIIa)<sup>a</sup>.

| $T / \text{K}$ | $C_{pm} / \text{J} \cdot \text{K}^{-1} \cdot \text{mol}^{-1}$ | $\delta_{\text{rel}}^b$ |
|----------------|---------------------------------------------------------------|-------------------------|
| 270.51         | 123.67                                                        | -0.18                   |
| 275.00         | 123.93                                                        | -0.16                   |
| 280.00         | 124.19                                                        | -0.15                   |
| 285.00         | 124.50                                                        | -0.09                   |
| 290.00         | 124.82                                                        | -0.01                   |
| 295.00         | 125.08                                                        | 0.04                    |
| 300.00         | 125.23                                                        | 0.02                    |
| 305.00         | 125.55                                                        | 0.14                    |
| 310.00         | 125.76                                                        | 0.18                    |
| 315.00         | 125.86                                                        | 0.16                    |
| 320.00         | 126.02                                                        | 0.19                    |
| 325.00         | 126.07                                                        | 0.15                    |
| 330.00         | 125.97                                                        | -0.01                   |
| 335.00         | 126.02                                                        | -0.02                   |
| 340.00         | 126.12                                                        | 0.01                    |
| 345.00         | 126.02                                                        | -0.11                   |
| 350.00         | 126.12                                                        | -0.05                   |
| 352.87         | 126.07                                                        | -0.10                   |

<sup>a</sup> Standard uncertainty  $u$  is  $u(T) = 0.05$  K, and the combined expanded uncertainty of the heat capacity is  $U_c(C_{p,m}) = 0.01C_{p,m}$  (0.95 level of confidence). Values are reported with one digit more than is justified by the experimental uncertainty to avoid round-off errors in calculations based on these results.

<sup>b</sup>  $\delta_{\text{rel}} = 100 \times (C_{pm} - C_{pm}^o) / C_{pm}^o$ , where heat capacity is calculated by means of Eqs. 1 and 2 with parameters from Table 2 in the main article.

**Table S6.** Experimental heat capacity of Ga<sub>2</sub>Te<sub>3</sub> (in J K<sup>-1</sup> mol<sup>-1</sup>) obtained using the relaxation technique (Quantum Design PPMS)<sup>a</sup>.

| $T / \text{K}$ | $C_{pm} / \text{J} \cdot \text{K}^{-1} \cdot \text{mol}^{-1}$ | $\delta_{\text{rel}}^b$ | $T / \text{K}$ | $C_{pm} / \text{J} \cdot \text{K}^{-1} \cdot \text{mol}^{-1}$ | $\delta_{\text{rel}}^b$ |
|----------------|---------------------------------------------------------------|-------------------------|----------------|---------------------------------------------------------------|-------------------------|
|                | Run 1                                                         |                         |                | Run 2                                                         |                         |
| 302.752        | 126.08                                                        | 0.62                    | 302.762        | 126.68                                                        | 1.10                    |
| 296.639        | 123.67                                                        | -1.13                   | 296.315        | 124.91                                                        | -0.13                   |
| 289.616        | 125.30                                                        | 0.39                    | 289.310        | 126.10                                                        | 1.04                    |
| 282.579        | 124.88                                                        | 0.30                    | 282.289        | 125.66                                                        | 0.94                    |
| 275.765        | 124.02                                                        | -0.12                   | 275.436        | 124.73                                                        | 0.46                    |
| 260.768        | 124.20                                                        | 0.71                    | 260.776        | 124.34                                                        | 0.82                    |
| 254.737        | 122.44                                                        | -0.41                   | 254.395        | 122.96                                                        | 0.03                    |
| 247.688        | 122.04                                                        | -0.34                   | 247.364        | 122.53                                                        | 0.08                    |
| 240.676        | 121.65                                                        | -0.23                   | 240.354        | 122.05                                                        | 0.12                    |
| 233.651        | 121.18                                                        | -0.16                   | 233.334        | 121.60                                                        | 0.21                    |
| 226.604        | 120.64                                                        | -0.10                   | 226.294        | 121.02                                                        | 0.24                    |
| 219.628        | 120.14                                                        | 0.02                    | 219.321        | 120.53                                                        | 0.36                    |
| 212.647        | 119.28                                                        | -0.13                   | 212.261        | 119.66                                                        | 0.22                    |
| 205.497        | 118.53                                                        | -0.13                   | 205.212        | 118.90                                                        | 0.21                    |
| 198.471        | 117.64                                                        | -0.21                   | 198.193        | 118.02                                                        | 0.14                    |
| 191.407        | 116.81                                                        | -0.20                   | 191.151        | 117.17                                                        | 0.14                    |
| 184.392        | 115.93                                                        | -0.18                   | 184.135        | 116.33                                                        | 0.20                    |
| 177.315        | 115.18                                                        | 0.04                    | 177.068        | 115.53                                                        | 0.37                    |
| 170.236        | 114.14                                                        | 0.08                    | 169.994        | 114.48                                                        | 0.41                    |
| 163.253        | 112.84                                                        | -0.02                   | 163.015        | 113.19                                                        | 0.32                    |
| 156.112        | 111.38                                                        | -0.13                   | 155.892        | 111.75                                                        | 0.24                    |
| 149.199        | 109.84                                                        | -0.23                   | 148.956        | 110.08                                                        | 0.04                    |
| 142.142        | 108.16                                                        | -0.27                   | 141.898        | 108.48                                                        | 0.08                    |
| 135.098        | 106.24                                                        | -0.35                   | 134.873        | 106.45                                                        | -0.10                   |
| 128.103        | 104.01                                                        | -0.54                   | 127.880        | 104.23                                                        | -0.26                   |
| 121.108        | 101.61                                                        | -0.64                   | 120.888        | 101.93                                                        | -0.26                   |
| 114.045        | 99.161                                                        | -0.49                   | 113.828        | 99.475                                                        | -0.09                   |
| 107.047        | 96.365                                                        | -0.36                   | 106.836        | 96.529                                                        | -0.09                   |
| 100.951        | 93.572                                                        | -0.28                   | 100.754        | 93.814                                                        | 0.08                    |
| 95.881         | 91.421                                                        | 0.23                    | 95.706         | 91.681                                                        | 0.62                    |
| 90.842         | 88.913                                                        | 0.62                    | 90.676         | 89.006                                                        | 0.84                    |
| 85.760         | 85.693                                                        | 0.51                    | 85.594         | 85.916                                                        | 0.89                    |
| 80.600         | 82.202                                                        | 0.41                    | 80.436         | 82.553                                                        | 0.98                    |
| 75.546         | 78.271                                                        | -0.04                   | 75.387         | 78.413                                                        | 0.29                    |
| 70.495         | 74.238                                                        | -0.34                   | 70.351         | 74.378                                                        | 0.00                    |
| 65.421         | 70.058                                                        | -0.49                   | 65.276         | 70.238                                                        | -0.06                   |
| 60.386         | 65.795                                                        | -0.44                   | 60.248         | 65.852                                                        | -0.17                   |
| 55.291         | 61.286                                                        | -0.24                   | 55.157         | 61.368                                                        | 0.10                    |
| 50.188         | 56.091                                                        | -0.67                   | 50.060         | 56.150                                                        | -0.34                   |
| 45.013         | 50.661                                                        | -0.82                   | 44.994         | 50.735                                                        | -0.63                   |
| 39.901         | 44.958                                                        | -0.68                   | 39.885         | 45.005                                                        | -0.53                   |
| 34.839         | 38.717                                                        | -0.46                   | 34.826         | 38.742                                                        | -0.35                   |
| 29.787         | 31.812                                                        | -0.21                   | 29.777         | 31.865                                                        | 0.00                    |
| 27.825         | 29.130                                                        | 0.48                    | 27.818         | 29.171                                                        | 0.65                    |
| 25.861         | 26.173                                                        | 0.56                    | 25.792         | 26.039                                                        | 0.45                    |
| 23.857         | 23.113                                                        | 0.71                    | 23.824         | 23.154                                                        | 1.11                    |

| $T / \text{K}$ | $C_{pm} / \text{J}\cdot\text{K}^{-1}\cdot\text{mol}^{-1}$ | $\delta_{\text{rel}}^{\text{b}}$ | $T / \text{K}$ | $C_{pm} / \text{J}\cdot\text{K}^{-1}\cdot\text{mol}^{-1}$ | $\delta_{\text{rel}}^{\text{b}}$ |
|----------------|-----------------------------------------------------------|----------------------------------|----------------|-----------------------------------------------------------|----------------------------------|
| Run 1          |                                                           |                                  | Run 2          |                                                           |                                  |
| 21.899         | 20.114                                                    | 0.96                             | 21.843         | 19.974                                                    | 0.70                             |
| 19.789         | 17.178                                                    | 2.99                             | 19.742         | 16.774                                                    | 1.00                             |
| 17.760         | 13.346                                                    | -1.86                            | 17.724         | 13.497                                                    | -0.35                            |
| 15.788         | 10.553                                                    | -0.46                            | 15.793         | 10.454                                                    | -1.47                            |
| 13.718         | 7.4466                                                    | -1.18                            | 13.720         | 7.4398                                                    | -1.31                            |
| 11.726         | 4.8410                                                    | -0.50                            | 11.726         | 4.8363                                                    | -0.59                            |
| 9.735          | 2.7367                                                    | 0.53                             | 9.733          | 2.7359                                                    | 0.57                             |
| 7.323          | 1.0569                                                    | 1.39                             | 7.355          | 1.0861                                                    | 2.63                             |
| 5.943          | 0.50200                                                   | -0.60                            | 5.947          | 0.50070                                                   | -1.09                            |
| 4.932          | 0.26054                                                   | -1.39                            | 4.933          | 0.26137                                                   | -1.15                            |
| 4.101          | 0.13915                                                   | -0.84                            | 4.093          | 0.13931                                                   | -0.06                            |
| 3.494          | 0.082454                                                  | 0.30                             | 3.495          | 0.082547                                                  | 0.32                             |
| 2.950          | 0.047728                                                  | 0.48                             | 2.951          | 0.047764                                                  | 0.45                             |
| 2.518          | 0.028925                                                  | 0.38                             | 2.517          | 0.028924                                                  | 0.50                             |
| 2.175          | 0.018463                                                  | 0.77                             | 2.175          | 0.018458                                                  | 0.75                             |
| 1.911          | 0.012213                                                  | -1.12                            | 1.911          | 0.012254                                                  | -0.79                            |

<sup>a</sup> Standard uncertainty of temperature is  $u(T)=0.004$  K, and the combined expanded uncertainty of heat capacity  $U_c(C_{pm})$  with 0.95 level of confidence ( $k=2$ ) is  $U_c(C_{pm})=0.1 C_{pm}$  below 10 K;  $U_c(C_{pm})=0.03 C_{pm}$  in temperature range 10 to 40 K;  $U_c(C_{pm})=0.02 C_{pm}$  in temperature range 40 to 300 K. Values are reported with more digits than is justified by the experimental uncertainty to avoid round-off errors in calculations based on these results. Measurements are performed in vacuum (residual pressure  $p<10^{-4}$  Pa). Excluded points are printed in gray (see text).

<sup>b</sup>  $\delta_{\text{rel}} = 100 \times (C_{pm} - C_{pm}^{\circ}) / C_{pm}^{\circ}$ , where heat capacity is calculated by means of Eqs. 1 and 2 with parameters from Table 2 in the main article.

**Table S7.** Experimental heat capacity of In<sub>2</sub>S<sub>3</sub> (in J K<sup>-1</sup> mol<sup>-1</sup>) obtained using Tian–Calvet calorimetry (SETARAM μDSC IIIa)<sup>a</sup>.

| <i>T</i> / K | <i>C</i> <sub><i>p</i>m</sub> /J•K <sup>-1</sup> •mol <sup>-1</sup> | δ <sub>rel</sub> <sup>b</sup> |
|--------------|---------------------------------------------------------------------|-------------------------------|
| 262.02       | 112.25                                                              | 0.01                          |
| 265.00       | 112.64                                                              | 0.12                          |
| 270.00       | 113.19                                                              | 0.24                          |
| 275.00       | 113.68                                                              | 0.33                          |
| 280.00       | 114.04                                                              | 0.34                          |
| 285.00       | 114.11                                                              | 0.12                          |
| 290.00       | 113.88                                                              | -0.32                         |
| 295.00       | 113.78                                                              | -0.62                         |
| 300.00       | 114.14                                                              | -0.49                         |
| 305.00       | 114.69                                                              | -0.15                         |
| 310.00       | 114.76                                                              | -0.22                         |
| 315.00       | 114.99                                                              | -0.11                         |
| 320.00       | 115.34                                                              | 0.14                          |
| 323.32       | 115.47                                                              | 0.22                          |

<sup>a</sup> Standard uncertainty *u* is *u*(*T*) = 0.05 K, and the combined expanded uncertainty of the heat capacity is *U*<sub>c</sub>(*C*<sub>*p*m</sub>) = 0.01*C*<sub>*p*m</sub> (0.95 level of confidence). Values are reported with one digit more than is justified by the experimental uncertainty to avoid round-off errors in calculations based on these results.

<sup>b</sup> δ<sub>rel</sub> = 100×(*C*<sub>*p*m</sub> − *C*<sub>*p*m</sub><sup>o</sup>) / *C*<sub>*p*m</sub><sup>o</sup>, where heat capacity is calculated by means of Eqs. 1 and 2 with parameters from Table 2 in the main article.

**Table S8.** Experimental heat capacity of In<sub>2</sub>S<sub>3</sub> (in J K<sup>-1</sup> mol<sup>-1</sup>) obtained using the relaxation technique (Quantum Design PPMS)<sup>a</sup>.

| $T / \text{K}$ | $C_{pm} / \text{J} \cdot \text{K}^{-1} \cdot \text{mol}^{-1}$ | $\delta_{\text{rel}}^b$ | $T / \text{K}$ | $C_{pm} / \text{J} \cdot \text{K}^{-1} \cdot \text{mol}^{-1}$ | $\delta_{\text{rel}}^b$ |
|----------------|---------------------------------------------------------------|-------------------------|----------------|---------------------------------------------------------------|-------------------------|
|                | Run 1                                                         |                         |                | Run 2                                                         |                         |
| 302.399        | 115.45                                                        | 0.58                    | 302.409        | 115.92                                                        | 0.99                    |
| 295.686        | 115.31                                                        | 0.69                    | 295.496        | 115.93                                                        | 1.24                    |
| 288.691        | 115.16                                                        | 0.86                    | 288.497        | 115.62                                                        | 1.27                    |
| 281.726        | 114.32                                                        | 0.48                    | 281.515        | 114.80                                                        | 0.92                    |
| 274.721        | 113.44                                                        | 0.13                    | 274.527        | 113.86                                                        | 0.52                    |
| 267.723        | 112.60                                                        | -0.12                   | 267.536        | 112.91                                                        | 0.17                    |
| 260.759        | 111.68                                                        | -0.38                   | 260.561        | 112.05                                                        | -0.05                   |
| 253.757        | 110.91                                                        | -0.46                   | 253.561        | 111.21                                                        | -0.17                   |
| 246.803        | 110.16                                                        | -0.46                   | 246.581        | 110.47                                                        | -0.15                   |
| 239.797        | 109.39                                                        | -0.39                   | 239.572        | 109.67                                                        | -0.11                   |
| 232.786        | 108.67                                                        | -0.22                   | 232.572        | 108.93                                                        | 0.05                    |
| 225.801        | 107.73                                                        | -0.18                   | 225.588        | 108.04                                                        | 0.14                    |
| 218.797        | 106.79                                                        | -0.06                   | 218.584        | 107.01                                                        | 0.18                    |
| 211.768        | 105.50                                                        | -0.20                   | 211.578        | 105.78                                                        | 0.10                    |
| 204.781        | 104.26                                                        | -0.22                   | 204.586        | 104.54                                                        | 0.08                    |
| 197.779        | 103.03                                                        | -0.16                   | 197.596        | 103.29                                                        | 0.13                    |
| 190.754        | 101.80                                                        | -0.01                   | 190.587        | 102.04                                                        | 0.27                    |
| 183.770        | 100.41                                                        | 0.08                    | 183.608        | 100.62                                                        | 0.33                    |
| 176.776        | 98.791                                                        | 0.06                    | 176.602        | 99.045                                                        | 0.36                    |
| 169.758        | 97.151                                                        | 0.15                    | 169.591        | 97.376                                                        | 0.43                    |
| 162.706        | 95.280                                                        | 0.16                    | 162.548        | 95.483                                                        | 0.42                    |
| 155.757        | 93.081                                                        | -0.04                   | 155.583        | 93.241                                                        | 0.19                    |
| 148.735        | 90.651                                                        | -0.28                   | 148.555        | 90.897                                                        | 0.05                    |
| 141.720        | 88.126                                                        | -0.43                   | 141.531        | 88.304                                                        | -0.15                   |
| 134.732        | 85.439                                                        | -0.52                   | 134.543        | 85.621                                                        | -0.22                   |
| 127.732        | 82.681                                                        | -0.41                   | 127.548        | 82.808                                                        | -0.16                   |
| 120.703        | 79.571                                                        | -0.38                   | 120.518        | 79.764                                                        | -0.03                   |
| 113.685        | 76.137                                                        | -0.40                   | 113.512        | 76.306                                                        | -0.06                   |
| 106.725        | 72.399                                                        | -0.45                   | 106.543        | 72.503                                                        | -0.17                   |
| 100.684        | 69.058                                                        | -0.26                   | 100.501        | 69.136                                                        | 0.01                    |
| 95.623         | 66.226                                                        | 0.17                    | 95.461         | 66.307                                                        | 0.45                    |
| 90.572         | 63.206                                                        | 0.60                    | 90.414         | 63.242                                                        | 0.82                    |
| 85.494         | 59.735                                                        | 0.58                    | 85.330         | 59.783                                                        | 0.85                    |
| 80.397         | 56.013                                                        | 0.35                    | 80.240         | 56.030                                                        | 0.59                    |
| 75.379         | 52.090                                                        | -0.21                   | 75.226         | 52.191                                                        | 0.20                    |
| 70.303         | 48.334                                                        | -0.26                   | 70.158         | 48.345                                                        | -0.02                   |
| 65.229         | 44.531                                                        | -0.29                   | 65.094         | 44.535                                                        | -0.06                   |
| 60.154         | 40.628                                                        | -0.46                   | 60.017         | 40.623                                                        | -0.22                   |
| 55.094         | 36.889                                                        | -0.16                   | 54.965         | 36.880                                                        | 0.09                    |
| 50.076         | 32.984                                                        | -0.31                   | 49.951         | 32.964                                                        | -0.08                   |
| 44.993         | 28.933                                                        | -0.72                   | 44.875         | 28.897                                                        | -0.53                   |
| 39.938         | 24.959                                                        | -0.67                   | 39.823         | 24.913                                                        | -0.49                   |
| 34.841         | 20.850                                                        | -0.38                   | 34.742         | 20.808                                                        | -0.19                   |
| 29.766         | 16.626                                                        | 0.11                    | 29.677         | 16.575                                                        | 0.26                    |
| 27.777         | 14.961                                                        | 0.46                    | 27.738         | 14.955                                                        | 0.65                    |
| 25.742         | 13.209                                                        | 0.56                    | 25.704         | 13.205                                                        | 0.78                    |

| $T / \text{K}$ | $C_{pm} / \text{J}\cdot\text{K}^{-1}\cdot\text{mol}^{-1}$ | $\delta_{\text{rel}}^{\text{b}}$ | $T / \text{K}$ | $C_{pm} / \text{J}\cdot\text{K}^{-1}\cdot\text{mol}^{-1}$ | $\delta_{\text{rel}}^{\text{b}}$ |
|----------------|-----------------------------------------------------------|----------------------------------|----------------|-----------------------------------------------------------|----------------------------------|
| Run 1          |                                                           |                                  | Run 2          |                                                           |                                  |
| 23.796         | 11.511                                                    | 0.37                             | 23.763         | 11.508                                                    | 0.59                             |
| 21.793         | 9.9241                                                    | 1.43                             | 21.798         | 9.8370                                                    | 0.50                             |
| 19.709         | 8.2902                                                    | 2.53                             | 19.793         | 8.1694                                                    | 0.21                             |
| 17.716         | 6.4600                                                    | -0.76                            | 17.718         | 6.3906                                                    | -1.85                            |
| 15.701         | 4.8254                                                    | -2.03                            | 15.741         | 4.8455                                                    | -2.24                            |
| 13.675         | 3.3178                                                    | -2.15                            | 13.695         | 3.3462                                                    | -1.73                            |
| 11.719         | 2.0966                                                    | 0.35                             | 11.718         | 2.0956                                                    | 0.34                             |
| 9.697          | 1.1098                                                    | 3.14                             | 9.697          | 1.1157                                                    | 3.69                             |
| 7.672          | 0.46411                                                   | 2.09                             | 7.678          | 0.46468                                                   | 1.92                             |
| 5.933          | 0.17332                                                   | -1.85                            | 5.934          | 0.17343                                                   | -1.85                            |
| 4.935          | 0.088380                                                  | -2.76                            | 4.935          | 0.088329                                                  | -2.81                            |
| 4.107          | 0.047492                                                  | -0.57                            | 4.110          | 0.047588                                                  | -0.62                            |
| 3.440          | 0.026579                                                  | 0.47                             | 3.436          | 0.026512                                                  | 0.60                             |
| 2.950          | 0.016443                                                  | 1.29                             | 2.951          | 0.016444                                                  | 1.19                             |
| 2.516          | 0.010167                                                  | 1.81                             | 2.516          | 0.010155                                                  | 1.69                             |
| 2.180          | 0.0065595                                                 | 0.40                             | 2.180          | 0.0065614                                                 | 0.43                             |
| 1.915          | 0.0044153                                                 | -1.63                            | 1.912          | 0.0043963                                                 | -1.61                            |

<sup>a</sup> Standard uncertainty of temperature is  $u(T)=0.004 \text{ K}$ , and the combined expanded uncertainty of heat capacity  $U_c(C_{pm})$  with 0.95 level of confidence ( $k=2$ ) is  $U_c(C_{pm})=0.1 C_{pm}$  below 10 K;  $U_c(C_{pm})=0.03 C_{pm}$  in temperature range 10 to 40 K;  $U_c(C_{pm})=0.02 C_{pm}$  in temperature range 40 to 300 K. Values are reported with more digits than is justified by the experimental uncertainty to avoid round-off errors in calculations based on these results. Measurements are performed in vacuum (residual pressure  $p<10^{-4} \text{ Pa}$ ). Excluded points are printed in gray (see text). Experimental results from Quantum Design PPMS have been multiplied by a factor of 0.979 to agree with the more accurate SETARAM  $\mu\text{DSC IIIa}$ .

<sup>b</sup>  $\delta_{\text{rel}} = 100 \times (C_{pm} - C_{pm}^o) / C_{pm}^o$ , where heat capacity is calculated by means of Eqs. 1 and 2 with parameters from Table 2 in the main article.



**Table S9.** Experimental heat capacity of  $\text{In}_2\text{Se}_3$  (in  $\text{J K}^{-1} \text{mol}^{-1}$ ) obtained using Tian–Calvet calorimetry (SETARAM  $\mu\text{DSC IIIa}$ )<sup>a</sup>.

| $T / \text{K}$ | $C_{pm} / \text{J} \cdot \text{K}^{-1} \cdot \text{mol}^{-1}$ | $\delta_{\text{rel}}^b$ |
|----------------|---------------------------------------------------------------|-------------------------|
| 262.04         | 121.44                                                        | -0.07                   |
| 265.00         | 121.62                                                        | -0.09                   |
| 270.00         | 121.95                                                        | -0.09                   |
| 275.00         | 122.27                                                        | -0.09                   |
| 280.00         | 122.51                                                        | -0.16                   |
| 285.00         | 122.83                                                        | -0.14                   |
| 290.00         | 123.16                                                        | -0.12                   |
| 295.00         | 123.49                                                        | -0.09                   |
| 300.00         | 123.81                                                        | -0.06                   |
| 305.00         | 124.19                                                        | 0.02                    |
| 310.00         | 124.42                                                        | -0.02                   |
| 315.00         | 124.65                                                        | -0.05                   |
| 320.00         | 124.89                                                        | -0.08                   |
| 325.00         | 125.17                                                        | -0.06                   |
| 330.00         | 125.54                                                        | 0.03                    |
| 335.00         | 125.77                                                        | 0.01                    |
| 340.00         | 126.05                                                        | 0.03                    |
| 345.00         | 126.38                                                        | 0.09                    |
| 350.00         | 126.61                                                        | 0.08                    |

<sup>a</sup> Standard uncertainty  $u$  is  $u(T) = 0.05 \text{ K}$ , and the combined expanded uncertainty of the heat capacity is  $U_c(C_{p,m}) = 0.01 C_{p,m}$  (0.95 level of confidence). Values are reported with one digit more than is justified by the experimental uncertainty to avoid round-off errors in calculations based on these results.

<sup>b</sup>  $\delta_{\text{rel}} = 100 \times (C_{pm} - C_{pm}^o) / C_{pm}^o$ , where heat capacity is calculated by means of Eqs. 1 and 2 with parameters from Table 2 in the main article.

**Table S10.** Experimental heat capacity of  $\text{In}_2\text{Se}_3$  (in  $\text{J K}^{-1} \text{mol}^{-1}$ ) obtained using the relaxation technique (Quantum Design PPMS)<sup>a</sup>.

| $T / \text{K}$ | $C_{pm} / \text{J} \cdot \text{K}^{-1} \cdot \text{mol}^{-1}$ | $\delta_{\text{rel}}^b$ | $T / \text{K}$ | $C_{pm} / \text{J} \cdot \text{K}^{-1} \cdot \text{mol}^{-1}$ | $\delta_{\text{rel}}^b$ |
|----------------|---------------------------------------------------------------|-------------------------|----------------|---------------------------------------------------------------|-------------------------|
|                | Run 1                                                         |                         |                | Run 2                                                         |                         |
| 301.758        | 114.42                                                        | -7.72                   | 301.878        | 116.20                                                        | -6.29                   |
| 295.376        | 115.84                                                        | -6.30                   | 295.092        | 118.54                                                        | -4.10                   |
| 288.354        | 115.62                                                        | -6.16                   | 288.093        | 117.36                                                        | -4.74                   |
| 281.411        | 116.00                                                        | -5.53                   | 281.168        | 117.28                                                        | -4.47                   |
| 274.496        | 116.83                                                        | -4.51                   | 274.229        | 118.24                                                        | -3.35                   |
| 267.532        | 117.21                                                        | -3.84                   | 267.293        | 118.27                                                        | -2.96                   |
| 260.579        | 117.52                                                        | -3.21                   | 260.393        | 117.99                                                        | -2.81                   |
| 253.640        | 117.34                                                        | -2.96                   | 253.395        | 118.31                                                        | -2.15                   |
| 246.664        | 117.10                                                        | -2.74                   | 246.429        | 118.01                                                        | -1.97                   |
| 239.677        | 117.13                                                        | -2.27                   | 239.482        | 117.75                                                        | -1.74                   |
| 232.686        | 116.42                                                        | -2.39                   | 232.490        | 117.14                                                        | -1.77                   |
| 225.744        | 116.01                                                        | -2.23                   | 225.455        | 116.64                                                        | -1.68                   |
| 218.773        | 115.29                                                        | -2.30                   | 218.497        | 116.04                                                        | -1.64                   |
| 211.795        | 114.93                                                        | -2.03                   | 211.561        | 115.52                                                        | -1.50                   |
| 204.771        | 114.77                                                        | -1.54                   | 204.533        | 115.24                                                        | -1.11                   |
| 197.827        | 113.86                                                        | -1.65                   | 197.604        | 114.47                                                        | -1.10                   |
| 190.838        | 113.42                                                        | -1.30                   | 190.682        | 113.87                                                        | -0.89                   |
| 183.833        | 112.71                                                        | -1.12                   | 183.638        | 113.17                                                        | -0.69                   |
| 176.843        | 112.19                                                        | -0.70                   | 176.678        | 112.31                                                        | -0.57                   |
| 169.899        | 110.75                                                        | -1.01                   | 169.670        | 111.38                                                        | -0.41                   |
| 162.876        | 109.92                                                        | -0.66                   | 162.696        | 110.18                                                        | -0.40                   |
| 156.032        | 108.23                                                        | -1.01                   | 155.780        | 108.65                                                        | -0.58                   |
| 149.025        | 106.88                                                        | -0.88                   | 148.750        | 107.34                                                        | -0.39                   |
| 142.155        | 105.45                                                        | -0.69                   | 141.904        | 105.67                                                        | -0.42                   |
| 135.201        | 103.70                                                        | -0.60                   | 134.986        | 103.77                                                        | -0.47                   |
| 128.223        | 101.78                                                        | -0.44                   | 127.982        | 101.79                                                        | -0.36                   |
| 121.191        | 99.597                                                        | -0.27                   | 120.927        | 99.686                                                        | -0.08                   |
| 114.151        | 97.004                                                        | -0.19                   | 113.928        | 97.168                                                        | 0.07                    |
| 107.174        | 94.226                                                        | 0.02                    | 106.979        | 94.088                                                        | -0.03                   |
| 101.141        | 91.313                                                        | -0.01                   | 100.911        | 91.248                                                        | 0.05                    |
| 96.048         | 88.758                                                        | 0.13                    | 95.832         | 88.793                                                        | 0.31                    |
| 90.941         | 86.019                                                        | 0.36                    | 90.752         | 86.081                                                        | 0.56                    |
| 85.900         | 82.859                                                        | 0.36                    | 85.710         | 82.844                                                        | 0.49                    |
| 80.763         | 79.166                                                        | 0.12                    | 80.580         | 79.128                                                        | 0.24                    |
| 75.668         | 75.156                                                        | -0.20                   | 75.522         | 75.071                                                        | -0.17                   |
| 70.548         | 70.919                                                        | -0.41                   | 70.385         | 70.870                                                        | -0.29                   |
| 65.450         | 66.408                                                        | -0.58                   | 65.301         | 66.349                                                        | -0.47                   |
| 60.416         | 61.529                                                        | -0.90                   | 60.257         | 61.511                                                        | -0.68                   |
| 55.341         | 56.527                                                        | -0.79                   | 55.190         | 56.473                                                        | -0.61                   |
| 50.167         | 50.972                                                        | -0.81                   | 50.065         | 50.875                                                        | -0.78                   |
| 45.084         | 45.025                                                        | -1.12                   | 44.973         | 44.904                                                        | -1.10                   |
| 40.003         | 38.990                                                        | -0.88                   | 39.901         | 38.867                                                        | -0.87                   |
| 34.906         | 32.677                                                        | -0.46                   | 34.797         | 32.619                                                        | -0.21                   |
| 29.802         | 26.190                                                        | 0.28                    | 29.724         | 26.102                                                        | 0.34                    |
| 27.822         | 23.654                                                        | 0.67                    | 27.778         | 23.640                                                        | 0.86                    |
| 25.853         | 21.116                                                        | 1.04                    | 25.800         | 21.057                                                        | 1.09                    |

| $T / \text{K}$ | $C_{pm} / \text{J}\cdot\text{K}^{-1}\cdot\text{mol}^{-1}$ | $\delta_{\text{rel}}^{\text{b}}$ | $T / \text{K}$ | $C_{pm} / \text{J}\cdot\text{K}^{-1}\cdot\text{mol}^{-1}$ | $\delta_{\text{rel}}^{\text{b}}$ |
|----------------|-----------------------------------------------------------|----------------------------------|----------------|-----------------------------------------------------------|----------------------------------|
| Run 1          |                                                           |                                  | Run 2          |                                                           |                                  |
| 23.897         | 18.555                                                    | 1.13                             | 23.837         | 18.468                                                    | 1.09                             |
| 21.780         | 15.961                                                    | 2.07                             | 21.804         | 15.914                                                    | 1.57                             |
| 19.691         | 13.500                                                    | 3.47                             | 19.759         | 13.391                                                    | 1.99                             |
| 17.619         | 10.637                                                    | 0.72                             | 17.639         | 10.649                                                    | 0.60                             |
| 15.773         | 8.3038                                                    | -1.03                            | 15.758         | 8.3021                                                    | -0.84                            |
| 13.684         | 6.0098                                                    | -0.26                            | 13.690         | 5.9912                                                    | -0.67                            |
| 11.702         | 3.9997                                                    | 0.23                             | 11.702         | 3.9955                                                    | 0.12                             |
| 9.696          | 2.3253                                                    | 1.33                             | 9.696          | 2.3251                                                    | 1.32                             |
| 7.657          | 1.0843                                                    | 1.33                             | 7.662          | 1.0855                                                    | 1.22                             |
| 5.930          | 0.44684                                                   | 0.16                             | 5.932          | 0.44707                                                   | 0.10                             |
| 4.932          | 0.23206                                                   | -1.06                            | 4.932          | 0.23206                                                   | -1.06                            |
| 4.101          | 0.12372                                                   | 0.04                             | 4.103          | 0.12395                                                   | 0.05                             |
| 3.434          | 0.068136                                                  | 0.16                             | 3.430          | 0.067907                                                  | 0.21                             |
| 2.946          | 0.040694                                                  | -1.44                            | 2.947          | 0.040800                                                  | -1.29                            |
| 2.511          | 0.025145                                                  | 0.97                             | 2.511          | 0.025112                                                  | 0.84                             |
| 2.172          | 0.015990                                                  | 0.51                             | 2.171          | 0.015977                                                  | 0.57                             |
| 1.909          | 0.010710                                                  | -0.37                            | 1.910          | 0.010700                                                  | -0.62                            |

<sup>a</sup> Standard uncertainty of temperature is  $u(T)=0.004$  K, and the combined expanded uncertainty of heat capacity  $U_c(C_{pm})$  with 0.95 level of confidence ( $k=2$ ) is  $U_c(C_{pm})=0.1$   $C_{pm}$  below 10 K;  $U_c(C_{pm})=0.03$   $C_{pm}$  in temperature range 10 to 40 K;  $U_c(C_{pm})=0.02$   $C_{pm}$  in temperature range 40 to 300 K. Values are reported with more digits than is justified by the experimental uncertainty to avoid round-off errors in calculations based on these results. Measurements are performed in vacuum (residual pressure  $p<10^{-4}$  Pa). Excluded points are printed in gray (see text).

<sup>b</sup>  $\delta_{\text{rel}} = 100 \times (C_{pm} - C_{pm}^{\circ}) / C_{pm}^{\circ}$ , where heat capacity is calculated by means of Eqs. 1 and 2 with parameters from Table 2 in the main article.

**Table S11.** Experimental heat capacity of  $\text{In}_2\text{Te}_3$  (in  $\text{J K}^{-1} \text{mol}^{-1}$ ) obtained using Tian–Calvet calorimetry (SETARAM  $\mu\text{DSC IIIa}$ )<sup>a</sup>.

| $T / \text{K}$ | $C_{pm} / \text{J}\cdot\text{K}^{-1}\cdot\text{mol}^{-1}$ | $\delta_{\text{rel}}^{\text{b}}$ |
|----------------|-----------------------------------------------------------|----------------------------------|
| 261.76         | 122.92                                                    | -0.17                            |
| 265.00         | 123.04                                                    | -0.21                            |
| 270.00         | 123.28                                                    | -0.21                            |
| 275.00         | 123.53                                                    | -0.20                            |
| 280.00         | 123.71                                                    | -0.24                            |
| 285.00         | 123.90                                                    | -0.26                            |
| 290.00         | 124.14                                                    | -0.23                            |
| 295.00         | 124.39                                                    | -0.19                            |
| 300.00         | 124.63                                                    | -0.14                            |
| 305.00         | 124.94                                                    | -0.03                            |
| 310.00         | 125.12                                                    | -0.01                            |
| 315.00         | 125.24                                                    | -0.03                            |
| 320.00         | 125.37                                                    | -0.04                            |
| 325.00         | 125.55                                                    | 0.00                             |
| 330.00         | 125.67                                                    | 0.00                             |
| 335.00         | 125.80                                                    | 0.02                             |
| 340.00         | 125.86                                                    | -0.01                            |

<sup>a</sup> Standard uncertainty  $u$  is  $u(T) = 0.05 \text{ K}$ , and the combined expanded uncertainty of the heat capacity is  $U_c(C_{p,m}) = 0.01C_{p,m}$  (0.95 level of confidence). Values are reported with one digit more than is justified by the experimental uncertainty to avoid round-off errors in calculations based on these results.

<sup>b</sup>  $\delta_{\text{rel}} = 100 \times (C_{pm} - C_{pm}^{\circ}) / C_{pm}^{\circ}$ , where heat capacity is calculated by means of Eqs. 1 and 2 with parameters from Table 2 in the main article.

**Table S12.** Experimental heat capacity of  $\text{In}_2\text{Te}_3$  (in  $\text{J K}^{-1} \text{mol}^{-1}$ ) obtained using the relaxation technique (Quantum Design PPMS)<sup>a</sup>.

| $T / \text{K}$ | $C_{pm} / \text{J} \cdot \text{K}^{-1} \cdot \text{mol}^{-1}$ | $\delta_{\text{rel}}^b$ | $T / \text{K}$ | $C_{pm} / \text{J} \cdot \text{K}^{-1} \cdot \text{mol}^{-1}$ | $\delta_{\text{rel}}^b$ |
|----------------|---------------------------------------------------------------|-------------------------|----------------|---------------------------------------------------------------|-------------------------|
|                | Run 1                                                         |                         |                | Run 2                                                         |                         |
| 302.848        | 124.93                                                        | 0.03                    | 302.847        | 125.51                                                        | 0.48                    |
| 296.853        | 124.16                                                        | -0.42                   | 296.480        | 125.24                                                        | 0.45                    |
| 289.789        | 125.07                                                        | 0.52                    | 289.450        | 125.52                                                        | 0.89                    |
| 282.752        | 124.30                                                        | 0.14                    | 282.407        | 124.84                                                        | 0.59                    |
| 275.763        | 123.50                                                        | -0.26                   | 275.413        | 124.03                                                        | 0.19                    |
| 268.731        | 122.99                                                        | -0.40                   | 268.396        | 123.43                                                        | -0.03                   |
| 261.689        | 122.79                                                        | -0.27                   | 261.359        | 123.09                                                        | -0.01                   |
| 254.649        | 122.32                                                        | -0.34                   | 254.329        | 122.64                                                        | -0.07                   |
| 247.653        | 121.98                                                        | -0.30                   | 247.330        | 122.29                                                        | -0.03                   |
| 240.608        | 121.68                                                        | -0.20                   | 240.295        | 121.97                                                        | 0.06                    |
| 233.546        | 121.40                                                        | -0.06                   | 233.241        | 121.74                                                        | 0.24                    |
| 226.569        | 121.00                                                        | 0.00                    | 226.254        | 121.31                                                        | 0.27                    |
| 219.546        | 120.63                                                        | 0.11                    | 219.241        | 120.90                                                        | 0.35                    |
| 212.493        | 120.00                                                        | 0.02                    | 212.202        | 120.27                                                        | 0.26                    |
| 205.494        | 119.36                                                        | -0.06                   | 205.203        | 119.58                                                        | 0.15                    |
| 198.466        | 118.70                                                        | -0.13                   | 198.178        | 118.95                                                        | 0.10                    |
| 191.428        | 118.05                                                        | -0.16                   | 191.148        | 118.28                                                        | 0.06                    |
| 184.421        | 117.44                                                        | -0.13                   | 184.148        | 117.69                                                        | 0.11                    |
| 177.315        | 116.97                                                        | 0.07                    | 177.053        | 117.14                                                        | 0.24                    |
| 170.198        | 116.22                                                        | 0.10                    | 169.935        | 116.49                                                        | 0.35                    |
| 163.124        | 115.24                                                        | -0.01                   | 162.876        | 115.49                                                        | 0.23                    |
| 156.108        | 114.11                                                        | -0.16                   | 155.862        | 114.35                                                        | 0.07                    |
| 149.141        | 113.00                                                        | -0.22                   | 148.901        | 113.20                                                        | -0.01                   |
| 142.104        | 111.79                                                        | -0.21                   | 141.871        | 111.99                                                        | 0.00                    |
| 135.042        | 110.35                                                        | -0.27                   | 134.807        | 110.55                                                        | -0.05                   |
| 128.007        | 108.63                                                        | -0.40                   | 127.788        | 108.81                                                        | -0.19                   |
| 121.034        | 106.74                                                        | -0.49                   | 120.822        | 106.96                                                        | -0.24                   |
| 114.014        | 104.74                                                        | -0.43                   | 113.805        | 104.97                                                        | -0.15                   |
| 106.945        | 102.50                                                        | -0.26                   | 106.751        | 102.66                                                        | -0.03                   |
| 100.898        | 100.22                                                        | -0.17                   | 100.703        | 100.38                                                        | 0.07                    |
| 95.834         | 98.341                                                        | 0.18                    | 95.662         | 98.491                                                        | 0.41                    |
| 90.728         | 96.202                                                        | 0.55                    | 90.571         | 96.312                                                        | 0.75                    |
| 85.675         | 93.456                                                        | 0.53                    | 85.516         | 93.599                                                        | 0.78                    |
| 80.573         | 90.242                                                        | 0.32                    | 80.395         | 90.405                                                        | 0.62                    |
| 75.555         | 86.707                                                        | -0.01                   | 75.402         | 86.831                                                        | 0.25                    |
| 70.444         | 82.953                                                        | -0.19                   | 70.301         | 83.046                                                        | 0.05                    |
| 65.339         | 79.126                                                        | -0.07                   | 65.238         | 79.188                                                        | 0.11                    |
| 60.356         | 74.719                                                        | -0.37                   | 60.222         | 74.805                                                        | -0.10                   |
| 55.267         | 70.197                                                        | -0.20                   | 55.141         | 70.241                                                        | 0.03                    |
| 50.151         | 64.830                                                        | -0.61                   | 50.033         | 64.856                                                        | -0.38                   |
| 45.062         | 59.083                                                        | -0.99                   | 44.949         | 59.095                                                        | -0.75                   |
| 40.021         | 53.193                                                        | -0.85                   | 39.917         | 53.196                                                        | -0.61                   |
| 34.937         | 46.710                                                        | -0.62                   | 34.840         | 46.668                                                        | -0.43                   |
| 29.850         | 39.619                                                        | -0.28                   | 29.771         | 39.563                                                        | -0.12                   |
| 27.866         | 36.797                                                        | 0.21                    | 27.832         | 36.762                                                        | 0.25                    |
| 25.804         | 33.737                                                        | 0.71                    | 25.773         | 33.751                                                        | 0.90                    |

| $T / \text{K}$ | $C_{pm} / \text{J}\cdot\text{K}^{-1}\cdot\text{mol}^{-1}$ | $\delta_{\text{rel}}^{\text{b}}$ | $T / \text{K}$ | $C_{pm} / \text{J}\cdot\text{K}^{-1}\cdot\text{mol}^{-1}$ | $\delta_{\text{rel}}^{\text{b}}$ |
|----------------|-----------------------------------------------------------|----------------------------------|----------------|-----------------------------------------------------------|----------------------------------|
| Run 1          |                                                           |                                  | Run 2          |                                                           |                                  |
| 23.836         | 30.621                                                    | 0.94                             | 23.809         | 30.641                                                    | 1.15                             |
| 21.842         | 27.312                                                    | 0.95                             | 21.766         | 27.233                                                    | 1.13                             |
| 19.800         | 23.601                                                    | -0.14                            | 19.760         | 23.794                                                    | 0.97                             |
| 17.724         | 20.806                                                    | 3.71                             | 17.798         | 20.309                                                    | 0.58                             |
| 15.784         | 16.395                                                    | -0.80                            | 15.712         | 16.171                                                    | -1.35                            |
| 13.732         | 12.405                                                    | -1.44                            | 13.738         | 12.391                                                    | -1.65                            |
| 11.743         | 8.6066                                                    | -1.86                            | 11.740         | 8.6071                                                    | -1.79                            |
| 9.730          | 5.3086                                                    | 0.87                             | 9.764          | 5.2767                                                    | -0.76                            |
| 7.719          | 2.5340                                                    | 0.46                             | 7.723          | 2.5214                                                    | -0.21                            |
| 5.948          | 1.0135                                                    | 1.01                             | 5.948          | 1.0134                                                    | 1.00                             |
| 4.944          | 0.50811                                                   | 0.16                             | 4.941          | 0.50626                                                   | 0.02                             |
| 4.109          | 0.25658                                                   | 0.04                             | 4.107          | 0.25640                                                   | 0.15                             |
| 3.491          | 0.14312                                                   | -0.09                            | 3.494          | 0.14349                                                   | -0.14                            |
| 2.953          | 0.080108                                                  | -0.62                            | 2.953          | 0.080102                                                  | -0.63                            |
| 2.521          | 0.047727                                                  | -0.05                            | 2.521          | 0.047792                                                  | 0.09                             |
| 2.193          | 0.030565                                                  | 0.19                             | 2.192          | 0.030589                                                  | 0.42                             |
| 1.915          | 0.019909                                                  | -0.07                            | 1.915          | 0.019918                                                  | -0.03                            |

<sup>a</sup> Standard uncertainty of temperature is  $u(T)=0.004$  K, and the combined expanded uncertainty of heat capacity  $U_c(C_{pm})$  with 0.95 level of confidence ( $k=2$ ) is  $U_c(C_{pm})=0.1$   $C_{pm}$  below 10 K;  $U_c(C_{pm})=0.03$   $C_{pm}$  in temperature range 10 to 40 K;  $U_c(C_{pm})=0.02$   $C_{pm}$  in temperature range 40 to 300 K. Values are reported with more digits than is justified by the experimental uncertainty to avoid round-off errors in calculations based on these results. Measurements are performed in vacuum (residual pressure  $p<10^{-4}$  Pa). Excluded points are printed in gray (see text). Experimental results from Quantum Design PPMS have been multiplied by a factor of 0.988 to agree with the more accurate SETARAM  $\mu$ DSC IIIa.

<sup>b</sup>  $\delta_{\text{rel}} = 100 \times (C_{pm} - C_{pm}^o) / C_{pm}^o$ , where heat capacity is calculated by means of Eqs. 1 and 2 with parameters from Table 2 in the main article.

#### 4. Tabulated thermodynamic functions

Standard thermodynamic functions were calculated using fundamental thermodynamic relationships (assuming residual entropy at 0 K for all studied sesqui-chalcogenides to be 0 J·K<sup>-1</sup>·mol<sup>-1</sup>) and heat capacities  $C_{pm}^{\circ}(T)$  represented by Eqs 1 and 2 using parameters listed in Table 2:

$$S_m^{\circ}(T) = \int_0^T \frac{C_{pm}^{\circ}(T)}{T} dT \quad (S1)$$

$$\Delta_0^T H_m^{\circ} = \int_0^T C_{pm}^{\circ}(T) dT \quad (S2)$$

$$\Delta_0^T G_m^{\circ} = \Delta_0^T H_m^{\circ} - TS_m^{\circ}(T) \quad (S3)$$

**Table S13.** Standard Thermodynamic Functions of Ga<sub>2</sub>S<sub>3</sub> at  $p = 0.1$  MPa.<sup>a</sup>

| $T / K$        | $C_{pm}^{\circ} / J \cdot K^{-1} \cdot mol^{-1}$ | $S_m^{\circ} / J \cdot K^{-1} \cdot mol^{-1}$ | $\Delta_0^T H_m^{\circ} / kJ \cdot mol^{-1}$ | $\Delta_0^T G_m^{\circ} / kJ \cdot mol^{-1}$ |
|----------------|--------------------------------------------------|-----------------------------------------------|----------------------------------------------|----------------------------------------------|
| 1 <sup>b</sup> | 4.211E-04                                        | 1.474E-04                                     | 1.094E-07                                    | -3.799E-08                                   |
| 2              | 2.947E-03                                        | 1.049E-03                                     | 1.549E-06                                    | -5.482E-07                                   |
| 3              | 9.268E-03                                        | 3.281E-03                                     | 7.264E-06                                    | -2.578E-06                                   |
| 4              | 2.141E-02                                        | 7.442E-03                                     | 2.202E-05                                    | -7.752E-06                                   |
| 5              | 4.198E-02                                        | 1.425E-02                                     | 5.288E-05                                    | -1.834E-05                                   |
| 6              | 7.413E-02                                        | 2.454E-02                                     | 1.098E-04                                    | -3.740E-05                                   |
| 7              | 1.219E-01                                        | 3.932E-02                                     | 2.063E-04                                    | -6.891E-05                                   |
| 8              | 1.902E-01                                        | 5.980E-02                                     | 3.604E-04                                    | -1.179E-04                                   |
| 9              | 2.849E-01                                        | 8.738E-02                                     | 5.955E-04                                    | -1.909E-04                                   |
| 10             | 4.125E-01                                        | 1.237E-01                                     | 9.412E-04                                    | -2.956E-04                                   |
| 11             | 5.790E-01                                        | 1.705E-01                                     | 1.433E-03                                    | -4.417E-04                                   |
| 12             | 7.890E-01                                        | 2.295E-01                                     | 2.114E-03                                    | -6.406E-04                                   |
| 13             | 1.045                                            | 3.025E-01                                     | 3.027E-03                                    | -9.054E-04                                   |
| 14             | 1.347                                            | 3.906E-01                                     | 4.218E-03                                    | -1.251E-03                                   |
| 15             | 1.698                                            | 4.953E-01                                     | 5.737E-03                                    | -1.692E-03                                   |
| 16             | 2.097                                            | 6.173E-01                                     | 7.630E-03                                    | -2.247E-03                                   |
| 17             | 2.543                                            | 7.576E-01                                     | 9.946E-03                                    | -2.933E-03                                   |
| 18             | 3.036                                            | 9.166E-01                                     | 1.273E-02                                    | -3.768E-03                                   |
| 19             | 3.574                                            | 1.095                                         | 1.603E-02                                    | -4.773E-03                                   |
| 20             | 4.157                                            | 1.293                                         | 1.989E-02                                    | -5.965E-03                                   |
| 25             | 7.695                                            | 2.583                                         | 4.913E-02                                    | -1.545E-02                                   |
| 30             | 11.93                                            | 4.354                                         | 9.801E-02                                    | -3.260E-02                                   |
| 35             | 16.36                                            | 6.526                                         | 1.687E-01                                    | -5.965E-02                                   |
| 40             | 20.62                                            | 8.991                                         | 2.613E-01                                    | -9.835E-02                                   |
| 45             | 24.59                                            | 11.65                                         | 3.745E-01                                    | -1.499E-01                                   |
| 50             | 28.32                                            | 14.44                                         | 5.068E-01                                    | -2.151E-01                                   |
| 55             | 31.96                                            | 17.31                                         | 6.575E-01                                    | -2.944E-01                                   |
| 60             | 35.54                                            | 20.24                                         | 8.263E-01                                    | -3.883E-01                                   |
| 65             | 39.05                                            | 23.23                                         | 1.013                                        | -4.969E-01                                   |
| 70             | 42.48                                            | 26.25                                         | 1.217                                        | -6.206E-01                                   |

| $T / \text{K}$ | $C_{pm}^o / \text{J}\cdot\text{K}^{-1}\cdot\text{mol}^{-1}$ | $S_m^o / \text{J}\cdot\text{K}^{-1}\cdot\text{mol}^{-1}$ | $\Delta_0^T H_m^o / \text{kJ}\cdot\text{mol}^{-1}$ | $\Delta_0^T G_m^o / \text{kJ}\cdot\text{mol}^{-1}$ |
|----------------|-------------------------------------------------------------|----------------------------------------------------------|----------------------------------------------------|----------------------------------------------------|
| 75             | 45.82                                                       | 29.29                                                    | 1.437                                              | -7.594E-01                                         |
| 80             | 49.08                                                       | 32.35                                                    | 1.675                                              | -9.135E-01                                         |
| 85             | 52.24                                                       | 35.42                                                    | 1.928                                              | -1.083                                             |
| 90             | 55.30                                                       | 38.50                                                    | 2.197                                              | -1.268                                             |
| 95             | 58.26                                                       | 41.57                                                    | 2.481                                              | -1.468                                             |
| 100            | 61.11                                                       | 44.63                                                    | 2.779                                              | -1.683                                             |
| 110            | 66.47                                                       | 50.71                                                    | 3.418                                              | -2.160                                             |
| 120            | 71.42                                                       | 56.71                                                    | 4.107                                              | -2.697                                             |
| 130            | 75.96                                                       | 62.60                                                    | 4.845                                              | -3.294                                             |
| 140            | 80.14                                                       | 68.39                                                    | 5.625                                              | -3.949                                             |
| 150            | 83.96                                                       | 74.05                                                    | 6.446                                              | -4.661                                             |
| 160            | 87.46                                                       | 79.58                                                    | 7.304                                              | -5.430                                             |
| 170            | 90.66                                                       | 84.98                                                    | 8.194                                              | -6.252                                             |
| 180            | 93.57                                                       | 90.25                                                    | 9.116                                              | -7.129                                             |
| 190            | 96.20                                                       | 95.38                                                    | 10.07                                              | -8.057                                             |
| 200            | 98.59                                                       | 100.4                                                    | 11.04                                              | -9.036                                             |
| 210            | 100.7                                                       | 105.2                                                    | 12.04                                              | -10.06                                             |
| 220            | 102.7                                                       | 110.0                                                    | 13.05                                              | -11.14                                             |
| 230            | 104.4                                                       | 114.6                                                    | 14.09                                              | -12.26                                             |
| 240            | 106.0                                                       | 119.1                                                    | 15.14                                              | -13.43                                             |
| 250            | 107.4                                                       | 123.4                                                    | 16.21                                              | -14.64                                             |
| 260            | 108.7                                                       | 127.6                                                    | 17.29                                              | -15.90                                             |
| 270            | 109.8                                                       | 131.8                                                    | 18.38                                              | -17.20                                             |
| 273.15         | 110.2                                                       | 133.0                                                    | 18.73                                              | -17.61                                             |
| 280            | 110.9                                                       | 135.8                                                    | 19.48                                              | -18.53                                             |
| 290            | 111.9                                                       | 139.7                                                    | 20.60                                              | -19.91                                             |
| 298.15         | 112.6                                                       | 142.8                                                    | 21.51                                              | -21.06                                             |
| 300            | 112.8                                                       | 143.5                                                    | 21.72                                              | -21.33                                             |
| 310            | 113.6                                                       | 147.2                                                    | 22.85                                              | -22.78                                             |
| 320            | 114.3                                                       | 150.8                                                    | 23.99                                              | -24.27                                             |
| 330            | 115.0                                                       | 154.4                                                    | 25.14                                              | -25.80                                             |
| 340            | 115.7                                                       | 157.8                                                    | 26.29                                              | -27.36                                             |
| 350            | 116.3                                                       | 161.2                                                    | 27.45                                              | -28.95                                             |

<sup>a</sup> The combined expanded uncertainty of heat capacity  $U_c(C_{pm})$  as well as of all calculated thermodynamic values (with 0.95 level of confidence,  $k=2$ ) is  $U_c(X)=0.1 X$  below 10 K;  $U_c(X)=0.03 X$  in temperature range 10 to 40 K;  $U_c(X)=0.02 X$  in temperature range 40 to 260 K;  $U_c(X)=0.01 X$  in temperature range 260 to 350 K, where  $X$  represents the heat capacity or the thermodynamic property. Values are reported with one digit more than is justified by the experimental uncertainty to avoid round-off errors in calculations based on these results.

<sup>b</sup> Extrapolated values.



**Table S14.** Standard Thermodynamic Functions of  $\text{Ga}_2\text{Se}_3$  at  $p = 0.1 \text{ MPa}$ .<sup>a</sup>

| $T / \text{K}$ | $C_{pm}^o / \text{J}\cdot\text{K}^{-1}\cdot\text{mol}^{-1}$ | $S_m^o / \text{J}\cdot\text{K}^{-1}\cdot\text{mol}^{-1}$ | $\Delta_0^T H_m^o / \text{kJ}\cdot\text{mol}^{-1}$ | $\Delta_0^T G_m^o / \text{kJ}\cdot\text{mol}^{-1}$ |
|----------------|-------------------------------------------------------------|----------------------------------------------------------|----------------------------------------------------|----------------------------------------------------|
| 1 <sup>b</sup> | 6.440E-03                                                   | 4.848E-03                                                | 2.870E-06                                          | -1.979E-06                                         |
| 2              | 1.638E-02                                                   | 1.206E-02                                                | 1.382E-05                                          | -1.029E-05                                         |
| 3              | 3.511E-02                                                   | 2.182E-02                                                | 3.852E-05                                          | -2.693E-05                                         |
| 4              | 7.174E-02                                                   | 3.637E-02                                                | 8.996E-05                                          | -5.550E-05                                         |
| 5              | 1.386E-01                                                   | 5.889E-02                                                | 1.921E-04                                          | -1.023E-04                                         |
| 6              | 2.443E-01                                                   | 9.285E-02                                                | 3.800E-04                                          | -1.771E-04                                         |
| 7              | 3.991E-01                                                   | 1.414E-01                                                | 6.971E-04                                          | -2.929E-04                                         |
| 8              | 6.162E-01                                                   | 2.081E-01                                                | 1.199E-03                                          | -4.660E-04                                         |
| 9              | 9.094E-01                                                   | 2.968E-01                                                | 1.955E-03                                          | -7.164E-04                                         |
| 10             | 1.292                                                       | 4.116E-01                                                | 3.047E-03                                          | -1.068E-03                                         |
| 11             | 1.772                                                       | 5.564E-01                                                | 4.571E-03                                          | -1.550E-03                                         |
| 12             | 2.351                                                       | 7.347E-01                                                | 6.624E-03                                          | -2.192E-03                                         |
| 13             | 3.022                                                       | 9.487E-01                                                | 9.303E-03                                          | -3.031E-03                                         |
| 14             | 3.775                                                       | 1.200                                                    | 1.270E-02                                          | -4.102E-03                                         |
| 15             | 4.601                                                       | 1.488                                                    | 1.688E-02                                          | -5.443E-03                                         |
| 16             | 5.489                                                       | 1.813                                                    | 2.192E-02                                          | -7.090E-03                                         |
| 17             | 6.430                                                       | 2.174                                                    | 2.787E-02                                          | -9.081E-03                                         |
| 18             | 7.415                                                       | 2.569                                                    | 3.479E-02                                          | -1.145E-02                                         |
| 19             | 8.441                                                       | 2.997                                                    | 4.272E-02                                          | -1.423E-02                                         |
| 20             | 9.505                                                       | 3.457                                                    | 5.169E-02                                          | -1.745E-02                                         |
| 25             | 15.32                                                       | 6.190                                                    | 1.135E-01                                          | -4.129E-02                                         |
| 30             | 21.48                                                       | 9.527                                                    | 2.055E-01                                          | -8.036E-02                                         |
| 35             | 27.49                                                       | 13.29                                                    | 3.280E-01                                          | -1.373E-01                                         |
| 40             | 33.09                                                       | 17.34                                                    | 4.797E-01                                          | -2.138E-01                                         |
| 45             | 38.25                                                       | 21.54                                                    | 6.582E-01                                          | -3.109E-01                                         |
| 50             | 43.07                                                       | 25.82                                                    | 8.616E-01                                          | -4.293E-01                                         |
| 55             | 47.69                                                       | 30.14                                                    | 1.089                                              | -5.691E-01                                         |
| 60             | 52.15                                                       | 34.48                                                    | 1.338                                              | -7.307E-01                                         |
| 65             | 56.44                                                       | 38.83                                                    | 1.610                                              | -9.140E-01                                         |
| 70             | 60.55                                                       | 43.16                                                    | 1.902                                              | -1.119                                             |
| 75             | 64.49                                                       | 47.48                                                    | 2.215                                              | -1.346                                             |
| 80             | 68.25                                                       | 51.76                                                    | 2.547                                              | -1.594                                             |
| 85             | 71.83                                                       | 56.00                                                    | 2.897                                              | -1.863                                             |
| 90             | 75.21                                                       | 60.21                                                    | 3.265                                              | -2.154                                             |
| 95             | 78.40                                                       | 64.36                                                    | 3.649                                              | -2.465                                             |
| 100            | 81.38                                                       | 68.46                                                    | 4.049                                              | -2.797                                             |
| 110            | 86.75                                                       | 76.47                                                    | 4.890                                              | -3.522                                             |
| 120            | 91.38                                                       | 84.22                                                    | 5.781                                              | -4.326                                             |
| 130            | 95.38                                                       | 91.70                                                    | 6.716                                              | -5.206                                             |
| 140            | 98.84                                                       | 98.90                                                    | 7.687                                              | -6.159                                             |
| 150            | 101.8                                                       | 105.8                                                    | 8.691                                              | -7.183                                             |
| 160            | 104.4                                                       | 112.5                                                    | 9.722                                              | -8.274                                             |
| 170            | 106.7                                                       | 118.9                                                    | 10.78                                              | -9.431                                             |
| 180            | 108.6                                                       | 125.0                                                    | 11.85                                              | -10.65                                             |
| 190            | 110.4                                                       | 131.0                                                    | 12.95                                              | -11.93                                             |
| 200            | 111.9                                                       | 136.7                                                    | 14.06                                              | -13.27                                             |
| 210            | 113.3                                                       | 142.1                                                    | 15.19                                              | -14.66                                             |
| 220            | 114.5                                                       | 147.4                                                    | 16.33                                              | -16.11                                             |

| $T / \text{K}$ | $C_{pm}^o / \text{J}\cdot\text{K}^{-1}\cdot\text{mol}^{-1}$ | $S_m^o / \text{J}\cdot\text{K}^{-1}\cdot\text{mol}^{-1}$ | $\Delta_0^T H_m^o / \text{kJ}\cdot\text{mol}^{-1}$ | $\Delta_0^T G_m^o / \text{kJ}\cdot\text{mol}^{-1}$ |
|----------------|-------------------------------------------------------------|----------------------------------------------------------|----------------------------------------------------|----------------------------------------------------|
| 230            | 115.6                                                       | 152.6                                                    | 17.48                                              | -17.61                                             |
| 240            | 116.5                                                       | 157.5                                                    | 18.64                                              | -19.16                                             |
| 250            | 117.4                                                       | 162.3                                                    | 19.81                                              | -20.76                                             |
| 260            | 118.2                                                       | 166.9                                                    | 20.99                                              | -22.41                                             |
| 270            | 118.9                                                       | 171.4                                                    | 22.17                                              | -24.10                                             |
| 273.15         | 119.1                                                       | 172.8                                                    | 22.55                                              | -24.64                                             |
| 280            | 119.6                                                       | 175.7                                                    | 23.36                                              | -25.83                                             |
| 290            | 120.1                                                       | 179.9                                                    | 24.56                                              | -27.61                                             |
| 298.15         | 120.6                                                       | 183.2                                                    | 25.54                                              | -29.09                                             |
| 300            | 120.7                                                       | 184.0                                                    | 25.77                                              | -29.43                                             |
| 310            | 121.1                                                       | 188.0                                                    | 26.97                                              | -31.29                                             |
| 320            | 121.6                                                       | 191.8                                                    | 28.19                                              | -33.19                                             |
| 330            | 122.0                                                       | 195.6                                                    | 29.41                                              | -35.13                                             |
| 340            | 122.3                                                       | 199.2                                                    | 30.63                                              | -37.10                                             |
| 350            | 122.7                                                       | 202.8                                                    | 31.85                                              | -39.11                                             |

<sup>a</sup> The combined expanded uncertainty of heat capacity  $U_c(C_{pm})$  as well as of all calculated thermodynamic values (with 0.95 level of confidence,  $k=2$ ) is  $U_c(X)=0.1 X$  below 10 K;  $U_c(X)=0.03 X$  in temperature range 10 to 40 K;  $U_c(X)=0.02 X$  in temperature range 40 to 260 K;  $U_c(X)=0.01 X$  in temperature range 260 to 350 K, where  $X$  represents the heat capacity or the thermodynamic property. Values are reported with one digit more than is justified by the experimental uncertainty to avoid round-off errors in calculations based on these results.

<sup>b</sup> Extrapolated values.

**Table S15.** Standard Thermodynamic Functions of Ga<sub>2</sub>Te<sub>3</sub> at  $p = 0.1$  MPa.<sup>a</sup>

| $T / \text{K}$ | $C_{pm}^{\circ} / \text{J} \cdot \text{K}^{-1} \cdot \text{mol}^{-1}$ | $S_{\text{m}}^{\circ} / \text{J} \cdot \text{K}^{-1} \cdot \text{mol}^{-1}$ | $\Delta_0^T H_{\text{m}}^{\circ} / \text{kJ} \cdot \text{mol}^{-1}$ | $\Delta_0^T G_{\text{m}}^{\circ} / \text{kJ} \cdot \text{mol}^{-1}$ |
|----------------|-----------------------------------------------------------------------|-----------------------------------------------------------------------------|---------------------------------------------------------------------|---------------------------------------------------------------------|
| 1 <sup>b</sup> | 1.795E-03                                                             | 6.088E-04                                                                   | 4.547E-07                                                           | -1.540E-07                                                          |
| 2              | 1.418E-02                                                             | 4.742E-03                                                                   | 7.094E-06                                                           | -2.389E-06                                                          |
| 3              | 5.012E-02                                                             | 1.622E-02                                                                   | 3.659E-05                                                           | -1.207E-05                                                          |
| 4              | 1.290E-01                                                             | 4.013E-02                                                                   | 1.216E-04                                                           | -3.896E-05                                                          |
| 5              | 2.771E-01                                                             | 8.327E-02                                                                   | 3.176E-04                                                           | -9.873E-05                                                          |
| 6              | 5.221E-01                                                             | 1.538E-01                                                                   | 7.080E-04                                                           | -2.146E-04                                                          |
| 7              | 8.919E-01                                                             | 2.602E-01                                                                   | 1.403E-03                                                           | -4.182E-04                                                          |
| 8              | 1.412                                                                 | 4.115E-01                                                                   | 2.542E-03                                                           | -7.500E-04                                                          |
| 9              | 2.102                                                                 | 6.159E-01                                                                   | 4.284E-03                                                           | -1.259E-03                                                          |
| 10             | 2.969                                                                 | 8.807E-01                                                                   | 6.805E-03                                                           | -2.002E-03                                                          |
| 11             | 4.011                                                                 | 1.211                                                                       | 1.028E-02                                                           | -3.042E-03                                                          |
| 12             | 5.207                                                                 | 1.611                                                                       | 1.488E-02                                                           | -4.447E-03                                                          |
| 13             | 6.528                                                                 | 2.079                                                                       | 2.074E-02                                                           | -6.286E-03                                                          |
| 14             | 7.942                                                                 | 2.614                                                                       | 2.797E-02                                                           | -8.627E-03                                                          |
| 15             | 9.416                                                                 | 3.212                                                                       | 3.664E-02                                                           | -1.154E-02                                                          |
| 16             | 10.92                                                                 | 3.867                                                                       | 4.681E-02                                                           | -1.507E-02                                                          |
| 17             | 12.44                                                                 | 4.575                                                                       | 5.849E-02                                                           | -1.929E-02                                                          |
| 18             | 13.96                                                                 | 5.329                                                                       | 7.169E-02                                                           | -2.424E-02                                                          |
| 19             | 15.48                                                                 | 6.125                                                                       | 8.642E-02                                                           | -2.996E-02                                                          |
| 20             | 17.00                                                                 | 6.958                                                                       | 1.027E-01                                                           | -3.650E-02                                                          |
| 25             | 24.71                                                                 | 11.579                                                                      | 2.069E-01                                                           | -8.255E-02                                                          |
| 30             | 32.19                                                                 | 16.752                                                                      | 3.494E-01                                                           | -1.532E-01                                                          |
| 35             | 39.11                                                                 | 22.24                                                                       | 5.279E-01                                                           | -2.506E-01                                                          |
| 40             | 45.38                                                                 | 27.88                                                                       | 7.394E-01                                                           | -3.759E-01                                                          |
| 45             | 51.07                                                                 | 33.56                                                                       | 9.807E-01                                                           | -5.295E-01                                                          |
| 50             | 56.28                                                                 | 39.21                                                                       | 1.249                                                               | -7.114E-01                                                          |
| 55             | 61.16                                                                 | 44.81                                                                       | 1.543                                                               | -9.215E-01                                                          |
| 60             | 65.74                                                                 | 50.33                                                                       | 1.860                                                               | -1.159                                                              |
| 65             | 70.05                                                                 | 55.76                                                                       | 2.200                                                               | -1.425                                                              |
| 70             | 74.10                                                                 | 61.10                                                                       | 2.560                                                               | -1.717                                                              |
| 75             | 77.90                                                                 | 66.35                                                                       | 2.941                                                               | -2.036                                                              |
| 80             | 81.46                                                                 | 71.49                                                                       | 3.339                                                               | -2.380                                                              |
| 85             | 84.78                                                                 | 76.53                                                                       | 3.755                                                               | -2.750                                                              |
| 90             | 87.87                                                                 | 81.46                                                                       | 4.186                                                               | -3.145                                                              |
| 95             | 90.73                                                                 | 86.29                                                                       | 4.633                                                               | -3.565                                                              |
| 100            | 93.36                                                                 | 91.01                                                                       | 5.093                                                               | -4.008                                                              |
| 110            | 97.99                                                                 | 100.1                                                                       | 6.051                                                               | -4.964                                                              |
| 120            | 101.9                                                                 | 108.8                                                                       | 7.051                                                               | -6.009                                                              |
| 130            | 105.2                                                                 | 117.1                                                                       | 8.086                                                               | -7.139                                                              |
| 140            | 107.9                                                                 | 125.0                                                                       | 9.152                                                               | -8.350                                                              |
| 150            | 110.3                                                                 | 132.5                                                                       | 10.24                                                               | -9.639                                                              |
| 160            | 112.3                                                                 | 139.7                                                                       | 11.36                                                               | -11.00                                                              |
| 170            | 114.0                                                                 | 146.6                                                                       | 12.49                                                               | -12.43                                                              |
| 180            | 115.5                                                                 | 153.2                                                                       | 13.64                                                               | -13.93                                                              |
| 190            | 116.9                                                                 | 159.4                                                                       | 14.80                                                               | -15.49                                                              |
| 200            | 118.1                                                                 | 165.5                                                                       | 15.97                                                               | -17.12                                                              |
| 210            | 119.2                                                                 | 171.2                                                                       | 17.16                                                               | -18.80                                                              |
| 220            | 120.2                                                                 | 176.8                                                                       | 18.36                                                               | -20.54                                                              |

| $T / \text{K}$ | $C_{pm}^o / \text{J}\cdot\text{K}^{-1}\cdot\text{mol}^{-1}$ | $S_m^o / \text{J}\cdot\text{K}^{-1}\cdot\text{mol}^{-1}$ | $\Delta_0^T H_m^o / \text{kJ}\cdot\text{mol}^{-1}$ | $\Delta_0^T G_m^o / \text{kJ}\cdot\text{mol}^{-1}$ |
|----------------|-------------------------------------------------------------|----------------------------------------------------------|----------------------------------------------------|----------------------------------------------------|
| 230            | 121.1                                                       | 182.2                                                    | 19.56                                              | -22.34                                             |
| 240            | 121.9                                                       | 187.3                                                    | 20.78                                              | -24.19                                             |
| 250            | 122.6                                                       | 192.3                                                    | 22.00                                              | -26.08                                             |
| 260            | 123.3                                                       | 197.2                                                    | 23.23                                              | -28.03                                             |
| 270            | 123.9                                                       | 201.8                                                    | 24.46                                              | -30.03                                             |
| 273.15         | 124.0                                                       | 203.3                                                    | 24.86                                              | -30.67                                             |
| 280            | 124.4                                                       | 206.3                                                    | 25.71                                              | -32.07                                             |
| 290            | 124.8                                                       | 210.7                                                    | 26.95                                              | -34.15                                             |
| 298.15         | 125.1                                                       | 214.2                                                    | 27.97                                              | -35.88                                             |
| 300            | 125.2                                                       | 214.9                                                    | 28.20                                              | -36.28                                             |
| 310            | 125.5                                                       | 219.1                                                    | 29.46                                              | -38.45                                             |
| 320            | 125.8                                                       | 223.0                                                    | 30.71                                              | -40.66                                             |
| 330            | 126.0                                                       | 226.9                                                    | 31.97                                              | -42.91                                             |
| 340            | 126.1                                                       | 230.7                                                    | 33.23                                              | -45.20                                             |
| 350            | 126.2                                                       | 234.3                                                    | 34.49                                              | -47.53                                             |

<sup>a</sup> The combined expanded uncertainty of heat capacity  $U_c(C_{pm})$  as well as of all calculated thermodynamic values (with 0.95 level of confidence,  $k=2$ ) is  $U_c(X)=0.1 X$  below 10 K;  $U_c(X)=0.03 X$  in temperature range 10 to 40 K;  $U_c(X)=0.02 X$  in temperature range 40 to 260 K;  $U_c(X)=0.01 X$  in temperature range 260 to 350 K, where  $X$  represents the heat capacity or the thermodynamic property. Values are reported with one digit more than is justified by the experimental uncertainty to avoid round-off errors in calculations based on these results.

<sup>b</sup> Extrapolated values.

**Table S16.** Standard Thermodynamic Functions of  $\text{In}_2\text{S}_3$  at  $p = 0.1 \text{ MPa}$ .<sup>a</sup>

| $T / \text{K}$ | $C_{pm}^{\circ} / \text{J}\cdot\text{K}^{-1}\cdot\text{mol}^{-1}$ | $S_{\text{m}}^{\circ} / \text{J}\cdot\text{K}^{-1}\cdot\text{mol}^{-1}$ | $\Delta_0^T H_{\text{m}}^{\circ} / \text{kJ}\cdot\text{mol}^{-1}$ | $\Delta_0^T G_{\text{m}}^{\circ} / \text{kJ}\cdot\text{mol}^{-1}$ |
|----------------|-------------------------------------------------------------------|-------------------------------------------------------------------------|-------------------------------------------------------------------|-------------------------------------------------------------------|
| 1 <sup>b</sup> | 7.210E-04                                                         | 2.559E-04                                                               | 1.892E-07                                                         | -6.669E-08                                                        |
| 2              | 5.087E-03                                                         | 1.797E-03                                                               | 2.652E-06                                                         | -9.415E-07                                                        |
| 3              | 1.711E-02                                                         | 5.783E-03                                                               | 1.288E-05                                                         | -4.469E-06                                                        |
| 4              | 4.366E-02                                                         | 1.388E-02                                                               | 4.166E-05                                                         | -1.387E-05                                                        |
| 5              | 9.523E-02                                                         | 2.859E-02                                                               | 1.085E-04                                                         | -3.443E-05                                                        |
| 6              | 1.840E-01                                                         | 5.313E-02                                                               | 2.445E-04                                                         | -7.432E-05                                                        |
| 7              | 3.239E-01                                                         | 9.125E-02                                                               | 4.935E-04                                                         | -1.452E-04                                                        |
| 8              | 5.308E-01                                                         | 1.472E-01                                                               | 9.146E-04                                                         | -2.628E-04                                                        |
| 9              | 8.196E-01                                                         | 2.255E-01                                                               | 1.582E-03                                                         | -4.470E-04                                                        |
| 10             | 1.202                                                             | 3.308E-01                                                               | 2.585E-03                                                         | -7.227E-04                                                        |
| 11             | 1.684                                                             | 4.672E-01                                                               | 4.020E-03                                                         | -1.119E-03                                                        |
| 12             | 2.260                                                             | 6.378E-01                                                               | 5.985E-03                                                         | -1.669E-03                                                        |
| 13             | 2.914                                                             | 8.440E-01                                                               | 8.566E-03                                                         | -2.406E-03                                                        |
| 14             | 3.628                                                             | 1.086                                                                   | 1.183E-02                                                         | -3.368E-03                                                        |
| 15             | 4.382                                                             | 1.362                                                                   | 1.584E-02                                                         | -4.589E-03                                                        |
| 16             | 5.159                                                             | 1.669                                                                   | 2.061E-02                                                         | -6.102E-03                                                        |
| 17             | 5.945                                                             | 2.006                                                                   | 2.616E-02                                                         | -7.937E-03                                                        |
| 18             | 6.733                                                             | 2.368                                                                   | 3.250E-02                                                         | -1.012E-02                                                        |
| 19             | 7.522                                                             | 2.753                                                                   | 3.962E-02                                                         | -1.268E-02                                                        |
| 20             | 8.318                                                             | 3.159                                                                   | 4.754E-02                                                         | -1.563E-02                                                        |
| 25             | 12.50                                                             | 5.459                                                                   | 9.947E-02                                                         | -3.700E-02                                                        |
| 30             | 16.81                                                             | 8.119                                                                   | 1.727E-01                                                         | -7.082E-02                                                        |
| 35             | 21.06                                                             | 11.03                                                                   | 2.675E-01                                                         | -1.186E-01                                                        |
| 40             | 25.18                                                             | 14.11                                                                   | 3.831E-01                                                         | -1.814E-01                                                        |
| 45             | 29.15                                                             | 17.31                                                                   | 5.190E-01                                                         | -2.599E-01                                                        |
| 50             | 33.03                                                             | 20.58                                                                   | 6.745E-01                                                         | -3.546E-01                                                        |
| 55             | 36.88                                                             | 23.91                                                                   | 8.492E-01                                                         | -4.659E-01                                                        |
| 60             | 40.70                                                             | 27.28                                                                   | 1.043                                                             | -5.938E-01                                                        |
| 65             | 44.49                                                             | 30.69                                                                   | 1.256                                                             | -7.387E-01                                                        |
| 70             | 48.24                                                             | 34.13                                                                   | 1.488                                                             | -9.008E-01                                                        |
| 75             | 51.92                                                             | 37.58                                                                   | 1.738                                                             | -1.080                                                            |
| 80             | 55.53                                                             | 41.05                                                                   | 2.007                                                             | -1.277                                                            |
| 85             | 59.05                                                             | 44.52                                                                   | 2.294                                                             | -1.491                                                            |
| 90             | 62.45                                                             | 47.99                                                                   | 2.597                                                             | -1.722                                                            |
| 95             | 65.72                                                             | 51.46                                                                   | 2.918                                                             | -1.970                                                            |
| 100            | 68.83                                                             | 54.91                                                                   | 3.254                                                             | -2.236                                                            |
| 110            | 74.52                                                             | 61.74                                                                   | 3.972                                                             | -2.820                                                            |
| 120            | 79.55                                                             | 68.44                                                                   | 4.742                                                             | -3.471                                                            |
| 130            | 83.98                                                             | 74.99                                                                   | 5.561                                                             | -4.188                                                            |
| 140            | 87.88                                                             | 81.36                                                                   | 6.420                                                             | -4.970                                                            |
| 150            | 91.32                                                             | 87.54                                                                   | 7.317                                                             | -5.814                                                            |
| 160            | 94.37                                                             | 93.53                                                                   | 8.245                                                             | -6.720                                                            |
| 170            | 97.07                                                             | 99.34                                                                   | 9.203                                                             | -7.685                                                            |
| 180            | 99.48                                                             | 105.0                                                                   | 10.19                                                             | -8.706                                                            |
| 190            | 101.7                                                             | 110.4                                                                   | 11.19                                                             | -9.783                                                            |
| 200            | 103.6                                                             | 115.7                                                                   | 12.22                                                             | -10.91                                                            |
| 210            | 105.4                                                             | 120.8                                                                   | 13.26                                                             | -12.10                                                            |
| 220            | 107.1                                                             | 125.7                                                                   | 14.33                                                             | -13.33                                                            |

| $T / \text{K}$ | $C_{pm}^o / \text{J}\cdot\text{K}^{-1}\cdot\text{mol}^{-1}$ | $S_m^o / \text{J}\cdot\text{K}^{-1}\cdot\text{mol}^{-1}$ | $\Delta_0^T H_m^o / \text{kJ}\cdot\text{mol}^{-1}$ | $\Delta_0^T G_m^o / \text{kJ}\cdot\text{mol}^{-1}$ |
|----------------|-------------------------------------------------------------|----------------------------------------------------------|----------------------------------------------------|----------------------------------------------------|
| 230            | 108.5                                                       | 130.5                                                    | 15.40                                              | -14.61                                             |
| 240            | 109.9                                                       | 135.1                                                    | 16.50                                              | -15.94                                             |
| 250            | 111.0                                                       | 139.7                                                    | 17.60                                              | -17.31                                             |
| 260            | 112.0                                                       | 144.0                                                    | 18.72                                              | -18.73                                             |
| 270            | 112.9                                                       | 148.3                                                    | 19.84                                              | -20.19                                             |
| 273.15         | 113.2                                                       | 149.6                                                    | 20.20                                              | -20.66                                             |
| 280            | 113.7                                                       | 152.4                                                    | 20.97                                              | -21.70                                             |
| 290            | 114.2                                                       | 156.4                                                    | 22.11                                              | -23.24                                             |
| 298.15         | 114.6                                                       | 159.6                                                    | 23.05                                              | -24.53                                             |
| 300            | 114.7                                                       | 160.3                                                    | 23.26                                              | -24.82                                             |
| 310            | 115.0                                                       | 164.0                                                    | 24.41                                              | -26.44                                             |
| 320            | 115.2                                                       | 167.7                                                    | 25.56                                              | -28.10                                             |

<sup>a</sup> The combined expanded uncertainty of heat capacity  $U_c(C_{pm})$  as well as of all calculated thermodynamic values (with 0.95 level of confidence,  $k=2$ ) is  $U_c(X)=0.1 X$  below 10 K;  $U_c(X)=0.03 X$  in temperature range 10 to 40 K;  $U_c(X)=0.02 X$  in temperature range 40 to 260 K;  $U_c(X)=0.01 X$  in temperature range 260 to 320 K, where  $X$  represents the heat capacity or the thermodynamic property. Values are reported with one digit more than is justified by the experimental uncertainty to avoid round-off errors in calculations based on these results.

<sup>b</sup> Extrapolated values.

**Table S17.** Standard Thermodynamic Functions of In<sub>2</sub>Se<sub>3</sub> at  $p = 0.1$  MPa.<sup>a</sup>

| $T / \text{K}$ | $C_{pm}^{\circ} / \text{J} \cdot \text{K}^{-1} \cdot \text{mol}^{-1}$ | $S_{\text{m}}^{\circ} / \text{J} \cdot \text{K}^{-1} \cdot \text{mol}^{-1}$ | $\Delta_0^T H_{\text{m}}^{\circ} / \text{kJ} \cdot \text{mol}^{-1}$ | $\Delta_0^T G_{\text{m}}^{\circ} / \text{kJ} \cdot \text{mol}^{-1}$ |
|----------------|-----------------------------------------------------------------------|-----------------------------------------------------------------------------|---------------------------------------------------------------------|---------------------------------------------------------------------|
| 1 <sup>b</sup> | 1.588E-03                                                             | 5.425E-04                                                                   | 4.045E-07                                                           | -1.379E-07                                                          |
| 2              | 1.238E-02                                                             | 4.163E-03                                                                   | 6.218E-06                                                           | -2.109E-06                                                          |
| 3              | 4.377E-02                                                             | 1.418E-02                                                                   | 3.195E-05                                                           | -1.058E-05                                                          |
| 4              | 1.136E-01                                                             | 3.514E-02                                                                   | 1.065E-04                                                           | -3.409E-05                                                          |
| 5              | 2.460E-01                                                             | 7.332E-02                                                                   | 2.800E-04                                                           | -8.659E-05                                                          |
| 6              | 4.647E-01                                                             | 1.360E-01                                                                   | 6.273E-04                                                           | -1.889E-04                                                          |
| 7              | 7.902E-01                                                             | 2.306E-01                                                                   | 1.245E-03                                                           | -3.693E-04                                                          |
| 8              | 1.238                                                                 | 3.640E-01                                                                   | 2.249E-03                                                           | -6.631E-04                                                          |
| 9              | 1.816                                                                 | 5.419E-01                                                                   | 3.765E-03                                                           | -1.112E-03                                                          |
| 10             | 2.523                                                                 | 7.687E-01                                                                   | 5.924E-03                                                           | -1.763E-03                                                          |
| 11             | 3.348                                                                 | 1.047                                                                       | 8.850E-03                                                           | -2.667E-03                                                          |
| 12             | 4.277                                                                 | 1.378                                                                       | 1.266E-02                                                           | -3.875E-03                                                          |
| 13             | 5.292                                                                 | 1.759                                                                       | 1.743E-02                                                           | -5.439E-03                                                          |
| 14             | 6.372                                                                 | 2.191                                                                       | 2.326E-02                                                           | -7.410E-03                                                          |
| 15             | 7.499                                                                 | 2.669                                                                       | 3.019E-02                                                           | -9.836E-03                                                          |
| 16             | 8.655                                                                 | 3.189                                                                       | 3.827E-02                                                           | -1.276E-02                                                          |
| 17             | 9.829                                                                 | 3.749                                                                       | 4.751E-02                                                           | -1.623E-02                                                          |
| 18             | 11.01                                                                 | 4.345                                                                       | 5.793E-02                                                           | -2.027E-02                                                          |
| 19             | 12.21                                                                 | 4.972                                                                       | 6.954E-02                                                           | -2.493E-02                                                          |
| 20             | 13.42                                                                 | 5.629                                                                       | 8.236E-02                                                           | -3.023E-02                                                          |
| 25             | 19.78                                                                 | 9.300                                                                       | 1.652E-01                                                           | -6.730E-02                                                          |
| 30             | 26.38                                                                 | 13.49                                                                       | 2.806E-01                                                           | -1.241E-01                                                          |
| 35             | 32.95                                                                 | 18.05                                                                       | 4.289E-01                                                           | -2.028E-01                                                          |
| 40             | 39.33                                                                 | 22.87                                                                       | 6.098E-01                                                           | -3.050E-01                                                          |
| 45             | 45.44                                                                 | 27.86                                                                       | 8.218E-01                                                           | -4.318E-01                                                          |
| 50             | 51.20                                                                 | 32.95                                                                       | 1.064                                                               | -5.838E-01                                                          |
| 55             | 56.62                                                                 | 38.08                                                                       | 1.333                                                               | -7.613E-01                                                          |
| 60             | 61.68                                                                 | 43.23                                                                       | 1.629                                                               | -9.646E-01                                                          |
| 65             | 66.39                                                                 | 48.35                                                                       | 1.950                                                               | -1.194                                                              |
| 70             | 70.75                                                                 | 53.44                                                                       | 2.293                                                               | -1.448                                                              |
| 75             | 74.79                                                                 | 58.46                                                                       | 2.657                                                               | -1.728                                                              |
| 80             | 78.53                                                                 | 63.41                                                                       | 3.040                                                               | -2.033                                                              |
| 85             | 81.97                                                                 | 68.27                                                                       | 3.441                                                               | -2.362                                                              |
| 90             | 85.14                                                                 | 73.05                                                                       | 3.859                                                               | -2.715                                                              |
| 95             | 88.06                                                                 | 77.73                                                                       | 4.292                                                               | -3.092                                                              |
| 100            | 90.74                                                                 | 82.32                                                                       | 4.739                                                               | -3.492                                                              |
| 110            | 95.46                                                                 | 91.19                                                                       | 5.671                                                               | -4.360                                                              |
| 120            | 99.43                                                                 | 99.67                                                                       | 6.646                                                               | -5.315                                                              |
| 130            | 102.8                                                                 | 107.8                                                                       | 7.658                                                               | -6.352                                                              |
| 140            | 105.6                                                                 | 115.5                                                                       | 8.700                                                               | -7.469                                                              |
| 150            | 108.1                                                                 | 122.9                                                                       | 9.769                                                               | -8.661                                                              |
| 160            | 110.1                                                                 | 129.9                                                                       | 10.86                                                               | -9.925                                                              |
| 170            | 111.9                                                                 | 136.6                                                                       | 11.97                                                               | -11.26                                                              |
| 180            | 113.4                                                                 | 143.1                                                                       | 13.10                                                               | -12.66                                                              |
| 190            | 114.8                                                                 | 149.3                                                                       | 14.24                                                               | -14.12                                                              |
| 200            | 116.0                                                                 | 155.2                                                                       | 15.39                                                               | -15.64                                                              |
| 210            | 117.1                                                                 | 160.9                                                                       | 16.56                                                               | -17.22                                                              |
| 220            | 118.1                                                                 | 166.3                                                                       | 17.74                                                               | -18.86                                                              |

| $T / \text{K}$ | $C_{p,m}^{\circ} / \text{J}\cdot\text{K}^{-1}\cdot\text{mol}^{-1}$ | $S_m^{\circ} / \text{J}\cdot\text{K}^{-1}\cdot\text{mol}^{-1}$ | $\Delta_0^T H_m^{\circ} / \text{kJ}\cdot\text{mol}^{-1}$ | $\Delta_0^T G_m^{\circ} / \text{kJ}\cdot\text{mol}^{-1}$ |
|----------------|--------------------------------------------------------------------|----------------------------------------------------------------|----------------------------------------------------------|----------------------------------------------------------|
| 230            | 119.0                                                              | 171.6                                                          | 18.92                                                    | -20.55                                                   |
| 240            | 119.9                                                              | 176.7                                                          | 20.12                                                    | -22.29                                                   |
| 250            | 120.7                                                              | 181.6                                                          | 21.32                                                    | -24.08                                                   |
| 260            | 121.4                                                              | 186.3                                                          | 22.53                                                    | -25.92                                                   |
| 270            | 122.1                                                              | 190.9                                                          | 23.75                                                    | -27.81                                                   |
| 273.15         | 122.3                                                              | 192.4                                                          | 24.13                                                    | -28.41                                                   |
| 280            | 122.7                                                              | 195.4                                                          | 24.97                                                    | -29.74                                                   |
| 290            | 123.3                                                              | 199.7                                                          | 26.20                                                    | -31.71                                                   |
| 298.15         | 123.8                                                              | 203.1                                                          | 27.21                                                    | -33.36                                                   |
| 300            | 123.9                                                              | 203.9                                                          | 27.44                                                    | -33.73                                                   |
| 310            | 124.4                                                              | 208.0                                                          | 28.68                                                    | -35.79                                                   |
| 320            | 125.0                                                              | 211.9                                                          | 29.92                                                    | -37.89                                                   |
| 330            | 125.5                                                              | 215.8                                                          | 31.18                                                    | -40.03                                                   |
| 340            | 126.0                                                              | 219.5                                                          | 32.43                                                    | -42.21                                                   |

<sup>a</sup> The combined expanded uncertainty of heat capacity  $U_c(C_{p,m})$  as well as of all calculated thermodynamic values (with 0.95 level of confidence,  $k=2$ ) is  $U_c(X)=0.1$  X below 10 K;  $U_c(X)=0.03$  X in temperature range 10 to 40 K;  $U_c(X)=0.02$  X in temperature range 40 to 260 K;  $U_c(X)=0.01$  X in temperature range 260 to 340 K, where X represents the heat capacity or the thermodynamic property. Values are reported with one digit more than is justified by the experimental uncertainty to avoid round-off errors in calculations based on these results.

<sup>b</sup> Extrapolated values.



**Table S18.** Standard Thermodynamic Functions of  $\text{In}_2\text{Te}_3$  at  $p = 0.1 \text{ MPa}$ .<sup>a</sup>

| $T / \text{K}$ | $C_{pm}^{\circ} / \text{J}\cdot\text{K}^{-1}\cdot\text{mol}^{-1}$ | $S_{\text{m}}^{\circ} / \text{J}\cdot\text{K}^{-1}\cdot\text{mol}^{-1}$ | $\Delta_0^T H_{\text{m}}^{\circ} / \text{kJ}\cdot\text{mol}^{-1}$ | $\Delta_0^T G_{\text{m}}^{\circ} / \text{kJ}\cdot\text{mol}^{-1}$ |
|----------------|-------------------------------------------------------------------|-------------------------------------------------------------------------|-------------------------------------------------------------------|-------------------------------------------------------------------|
| 1 <sup>b</sup> | 2.791E-03                                                         | 9.426E-04                                                               | 7.045E-07                                                         | -2.381E-07                                                        |
| 2              | 2.282E-02                                                         | 7.491E-03                                                               | 1.124E-05                                                         | -3.740E-06                                                        |
| 3              | 8.502E-02                                                         | 2.651E-02                                                               | 6.019E-05                                                         | -1.934E-05                                                        |
| 4              | 2.326E-01                                                         | 6.846E-02                                                               | 2.095E-04                                                         | -6.434E-05                                                        |
| 5              | 5.290E-01                                                         | 1.488E-01                                                               | 5.751E-04                                                         | -1.690E-04                                                        |
| 6              | 1.036                                                             | 2.865E-01                                                               | 1.338E-03                                                         | -3.811E-04                                                        |
| 7              | 1.800                                                             | 5.000E-01                                                               | 2.733E-03                                                         | -7.672E-04                                                        |
| 8              | 2.844                                                             | 8.054E-01                                                               | 5.031E-03                                                         | -1.412E-03                                                        |
| 9              | 4.157                                                             | 1.214                                                                   | 8.511E-03                                                         | -2.412E-03                                                        |
| 10             | 5.699                                                             | 1.730                                                                   | 1.342E-02                                                         | -3.875E-03                                                        |
| 11             | 7.414                                                             | 2.352                                                                   | 1.997E-02                                                         | -5.907E-03                                                        |
| 12             | 9.251                                                             | 3.075                                                                   | 2.829E-02                                                         | -8.613E-03                                                        |
| 13             | 11.16                                                             | 3.891                                                                   | 3.849E-02                                                         | -1.209E-02                                                        |
| 14             | 13.11                                                             | 4.789                                                                   | 5.063E-02                                                         | -1.642E-02                                                        |
| 15             | 15.04                                                             | 5.760                                                                   | 6.470E-02                                                         | -2.169E-02                                                        |
| 16             | 16.93                                                             | 6.791                                                                   | 8.069E-02                                                         | -2.796E-02                                                        |
| 17             | 18.77                                                             | 7.873                                                                   | 9.855E-02                                                         | -3.529E-02                                                        |
| 18             | 20.55                                                             | 8.996                                                                   | 1.182E-01                                                         | -4.372E-02                                                        |
| 19             | 22.28                                                             | 10.15                                                                   | 1.396E-01                                                         | -5.329E-02                                                        |
| 20             | 23.97                                                             | 11.34                                                                   | 1.628E-01                                                         | -6.404E-02                                                        |
| 25             | 32.22                                                             | 17.58                                                                   | 3.034E-01                                                         | -1.362E-01                                                        |
| 30             | 39.95                                                             | 24.15                                                                   | 4.841E-01                                                         | -2.404E-01                                                        |
| 35             | 47.09                                                             | 30.85                                                                   | 7.019E-01                                                         | -3.779E-01                                                        |
| 40             | 53.63                                                             | 37.57                                                                   | 9.539E-01                                                         | -5.489E-01                                                        |
| 45             | 59.60                                                             | 44.24                                                                   | 1.237                                                             | -7.535E-01                                                        |
| 50             | 65.07                                                             | 50.81                                                                   | 1.549                                                             | -9.911E-01                                                        |
| 55             | 70.08                                                             | 57.25                                                                   | 1.887                                                             | -1.261                                                            |
| 60             | 74.68                                                             | 63.54                                                                   | 2.249                                                             | -1.563                                                            |
| 65             | 78.91                                                             | 69.69                                                                   | 2.633                                                             | -1.897                                                            |
| 70             | 82.78                                                             | 75.68                                                                   | 3.038                                                             | -2.260                                                            |
| 75             | 86.34                                                             | 81.52                                                                   | 3.461                                                             | -2.653                                                            |
| 80             | 89.60                                                             | 87.19                                                                   | 3.901                                                             | -3.075                                                            |
| 85             | 92.58                                                             | 92.72                                                                   | 4.356                                                             | -3.525                                                            |
| 90             | 95.30                                                             | 98.09                                                                   | 4.826                                                             | -4.002                                                            |
| 95             | 97.78                                                             | 103.3                                                                   | 5.309                                                             | -4.505                                                            |
| 100            | 100.0                                                             | 108.4                                                                   | 5.803                                                             | -5.035                                                            |
| 110            | 103.9                                                             | 118.1                                                                   | 6.823                                                             | -6.168                                                            |
| 120            | 107.0                                                             | 127.3                                                                   | 7.878                                                             | -7.395                                                            |
| 130            | 109.5                                                             | 135.9                                                                   | 8.961                                                             | -8.711                                                            |
| 140            | 111.6                                                             | 144.1                                                                   | 10.07                                                             | -10.11                                                            |
| 150            | 113.4                                                             | 151.9                                                                   | 11.19                                                             | -11.59                                                            |
| 160            | 114.8                                                             | 159.3                                                                   | 12.33                                                             | -13.15                                                            |
| 170            | 116.1                                                             | 166.3                                                                   | 13.49                                                             | -14.78                                                            |
| 180            | 117.2                                                             | 172.9                                                                   | 14.66                                                             | -16.47                                                            |
| 190            | 118.1                                                             | 179.3                                                                   | 15.83                                                             | -18.23                                                            |
| 200            | 119.0                                                             | 185.4                                                                   | 17.02                                                             | -20.06                                                            |
| 210            | 119.8                                                             | 191.2                                                                   | 18.21                                                             | -21.94                                                            |
| 220            | 120.5                                                             | 196.8                                                                   | 19.41                                                             | -23.88                                                            |

| $T / \text{K}$ | $C_{p,m}^{\circ} / \text{J}\cdot\text{K}^{-1}\cdot\text{mol}^{-1}$ | $S_m^{\circ} / \text{J}\cdot\text{K}^{-1}\cdot\text{mol}^{-1}$ | $\Delta_0^T H_m^{\circ} / \text{kJ}\cdot\text{mol}^{-1}$ | $\Delta_0^T G_m^{\circ} / \text{kJ}\cdot\text{mol}^{-1}$ |
|----------------|--------------------------------------------------------------------|----------------------------------------------------------------|----------------------------------------------------------|----------------------------------------------------------|
| 230            | 121.2                                                              | 202.2                                                          | 20.62                                                    | -25.88                                                   |
| 240            | 121.9                                                              | 207.3                                                          | 21.84                                                    | -27.92                                                   |
| 250            | 122.5                                                              | 212.3                                                          | 23.06                                                    | -30.02                                                   |
| 260            | 123.0                                                              | 217.1                                                          | 24.29                                                    | -32.17                                                   |
| 270            | 123.6                                                              | 221.8                                                          | 25.52                                                    | -34.37                                                   |
| 273.15         | 123.7                                                              | 223.2                                                          | 25.91                                                    | -35.07                                                   |
| 280            | 124.0                                                              | 226.3                                                          | 26.76                                                    | -36.61                                                   |
| 290            | 124.4                                                              | 230.7                                                          | 28.00                                                    | -38.89                                                   |
| 298.15         | 124.7                                                              | 234.1                                                          | 29.02                                                    | -40.78                                                   |
| 300            | 124.8                                                              | 234.9                                                          | 29.25                                                    | -41.22                                                   |
| 310            | 125.1                                                              | 239.0                                                          | 30.50                                                    | -43.59                                                   |
| 320            | 125.4                                                              | 243.0                                                          | 31.75                                                    | -46.00                                                   |
| 330            | 125.7                                                              | 246.8                                                          | 33.00                                                    | -48.45                                                   |
| 340            | 125.9                                                              | 250.6                                                          | 34.26                                                    | -50.93                                                   |

<sup>a</sup> The combined expanded uncertainty of heat capacity  $U_c(C_{p,m})$  as well as of all calculated thermodynamic values (with 0.95 level of confidence,  $k=2$ ) is  $U_c(X)=0.1$  X below 10 K;  $U_c(X)=0.03$  X in temperature range 10 to 40 K;  $U_c(X)=0.02$  X in temperature range 40 to 260 K;  $U_c(X)=0.01$  X in temperature range 260 to 340 K, where X represents the heat capacity or the thermodynamic property. Values are reported with one digit more than is justified by the experimental uncertainty to avoid round-off errors in calculations based on these results.

<sup>b</sup> Extrapolated values.
